# Supplementary material
Source: PubMed Central journal article supplement (PMC5014738)
Supplement: NIHMS796205-supplement-1.pdf [file NIHMS796205-supplement-1.pdf]

# Supplementary Figure 1

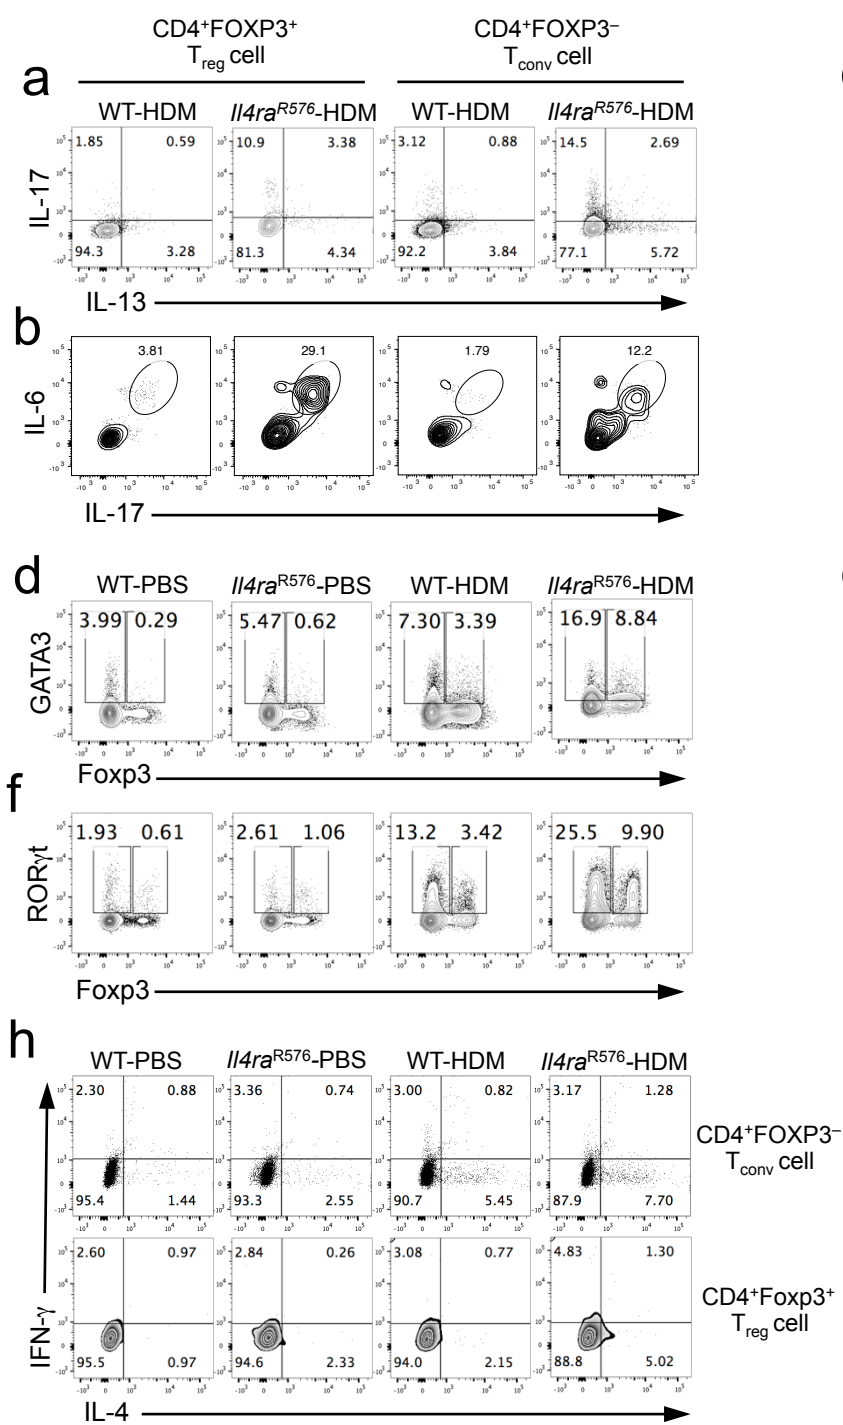

**c**

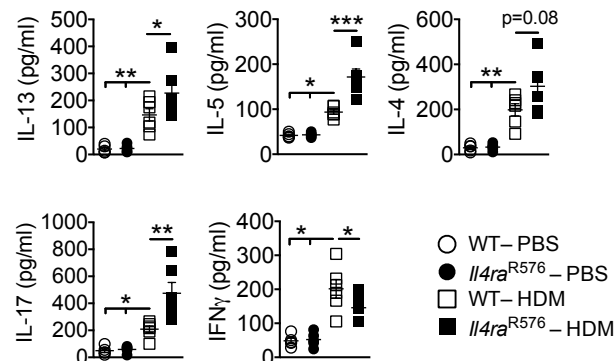

**e**

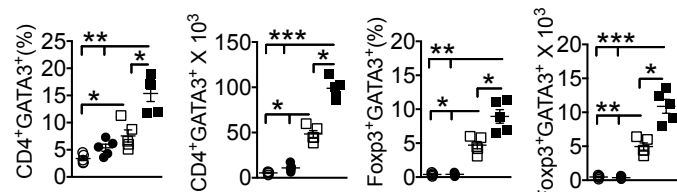

**g**

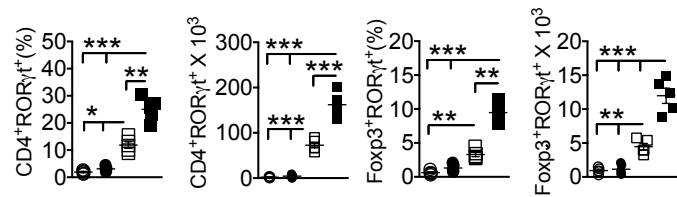

**i**

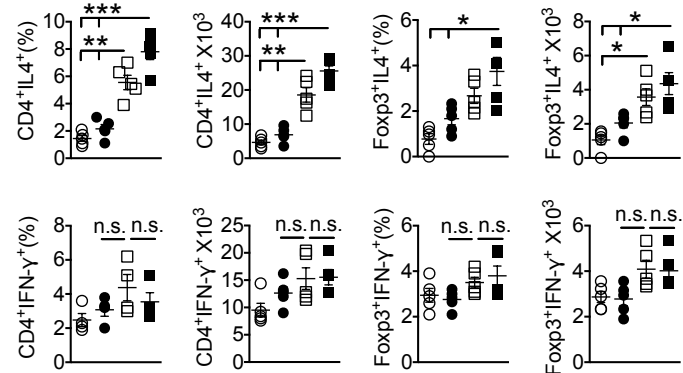

# Supplementary Figure 2

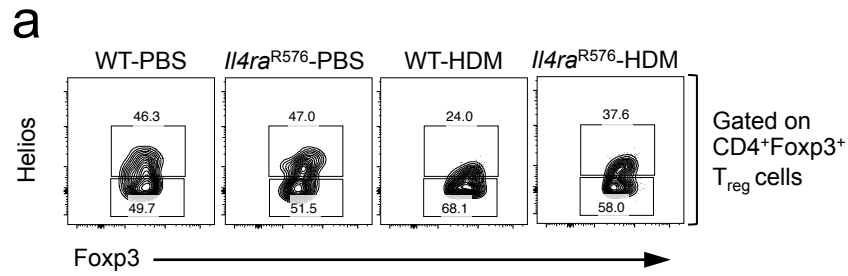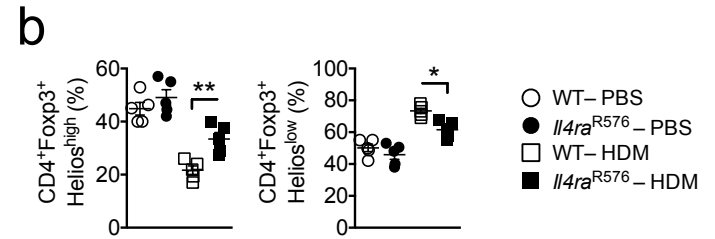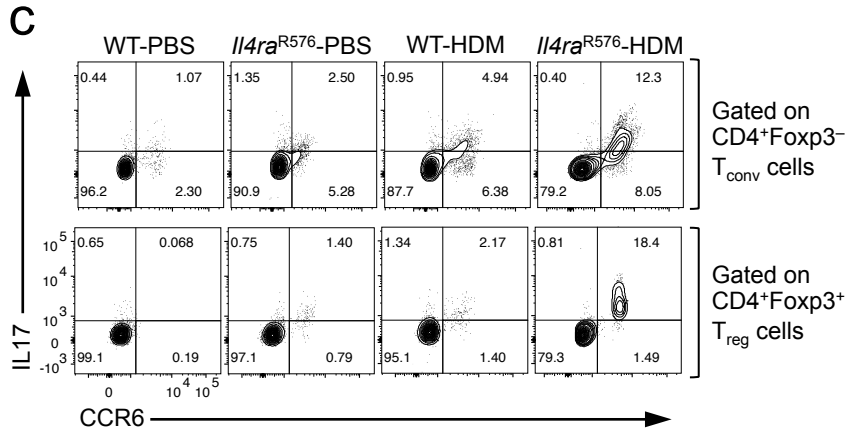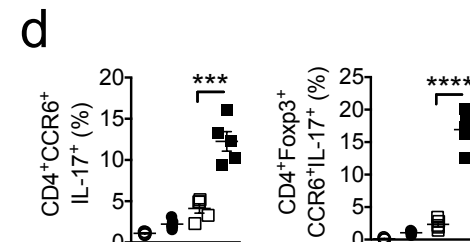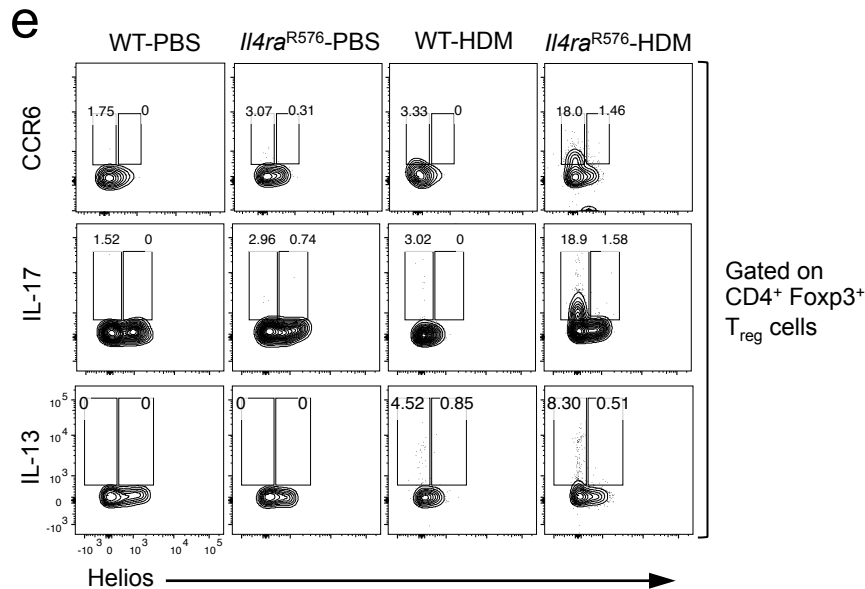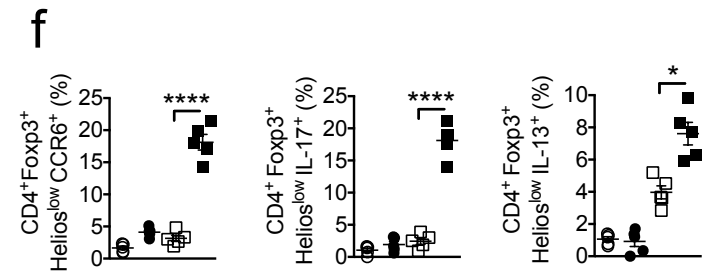

# Supplementary Figure 3

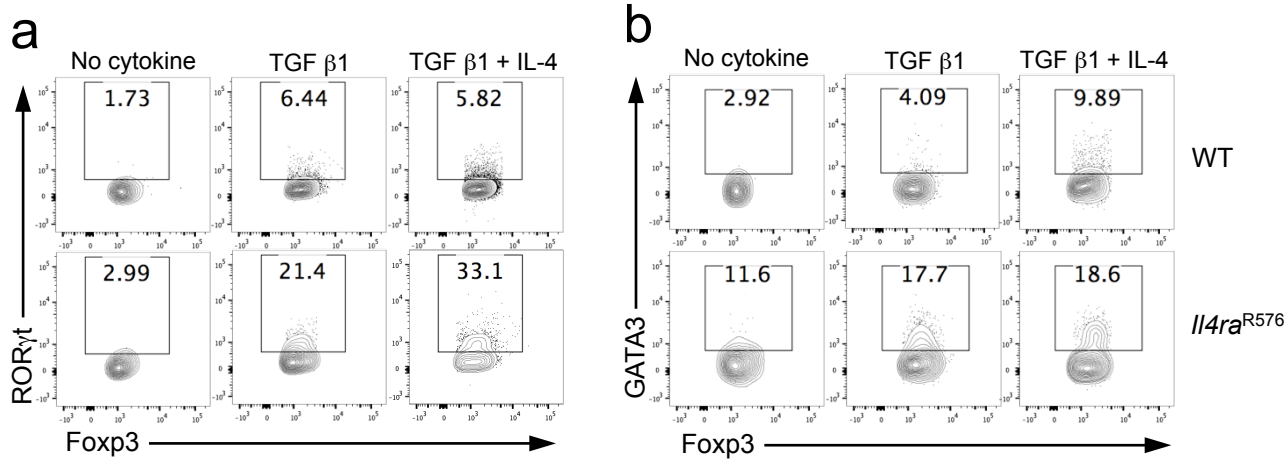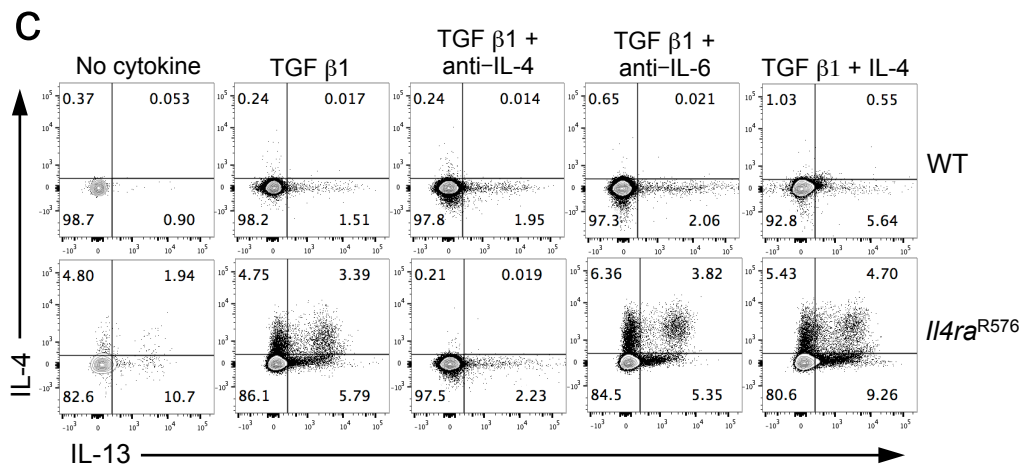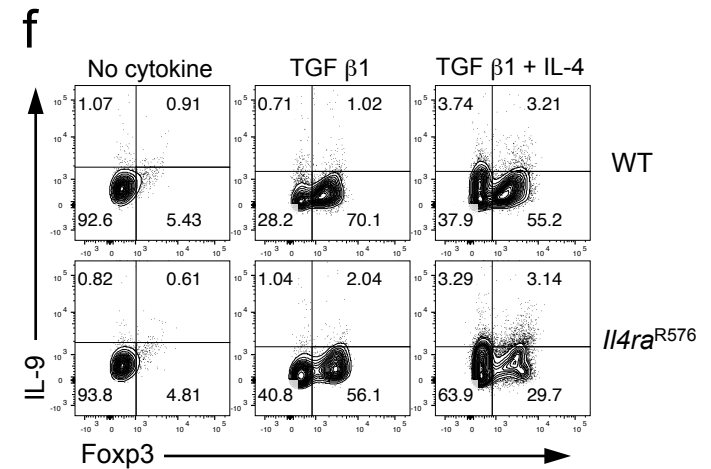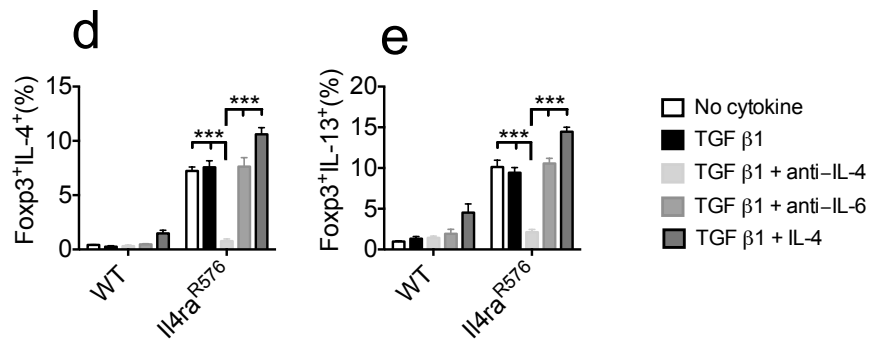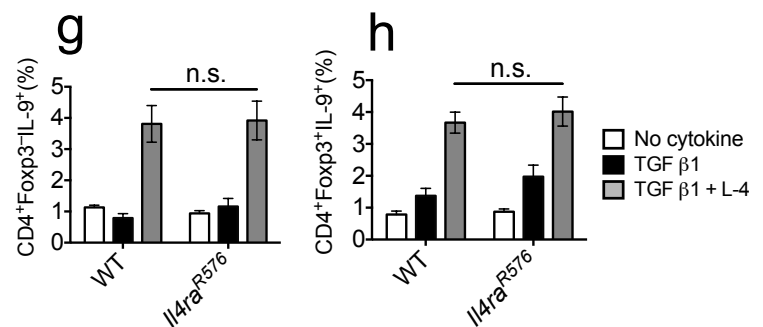

# Supplementary Figure 4

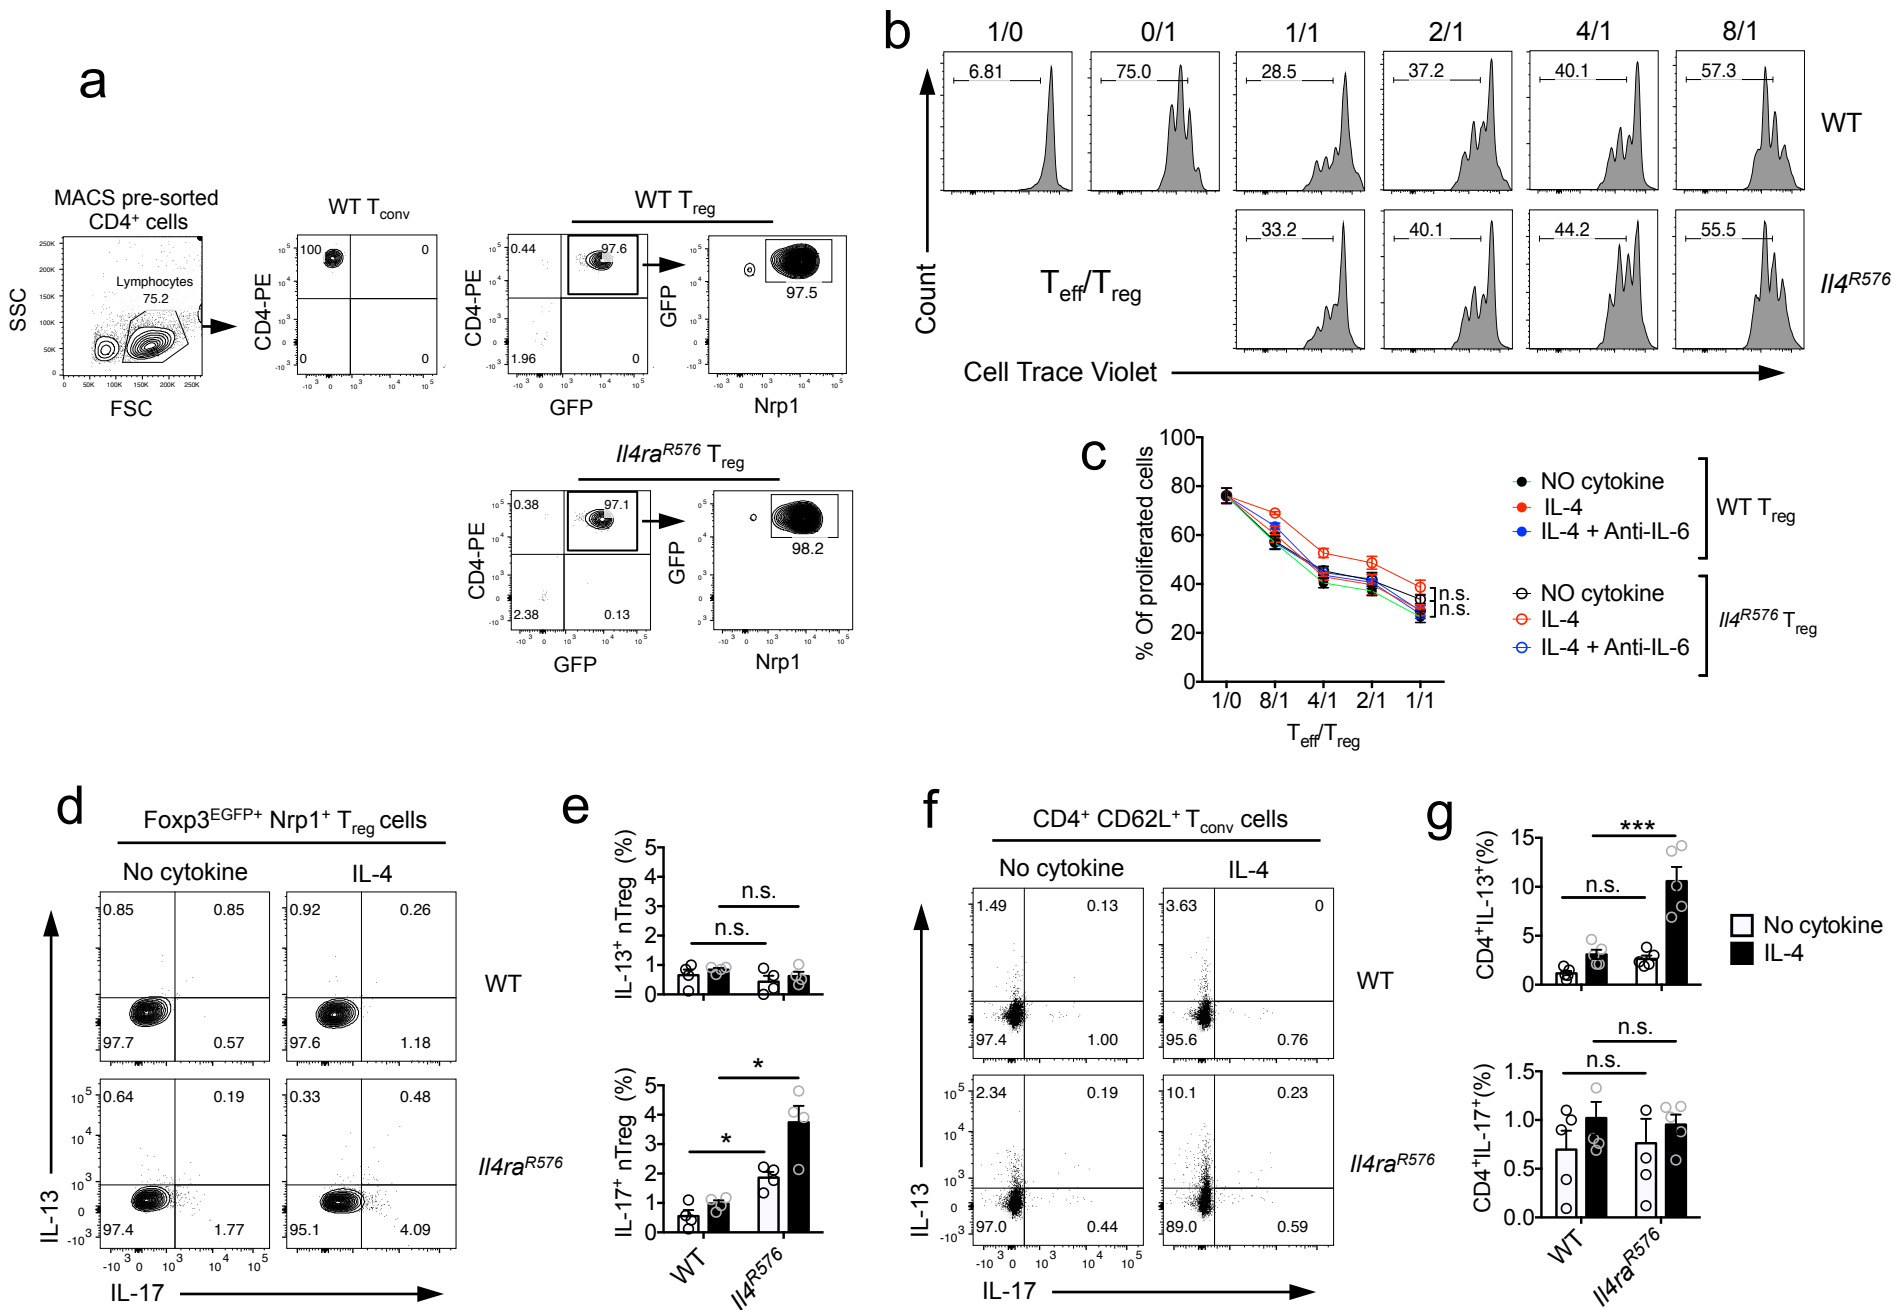

# Supplementary Figure 5

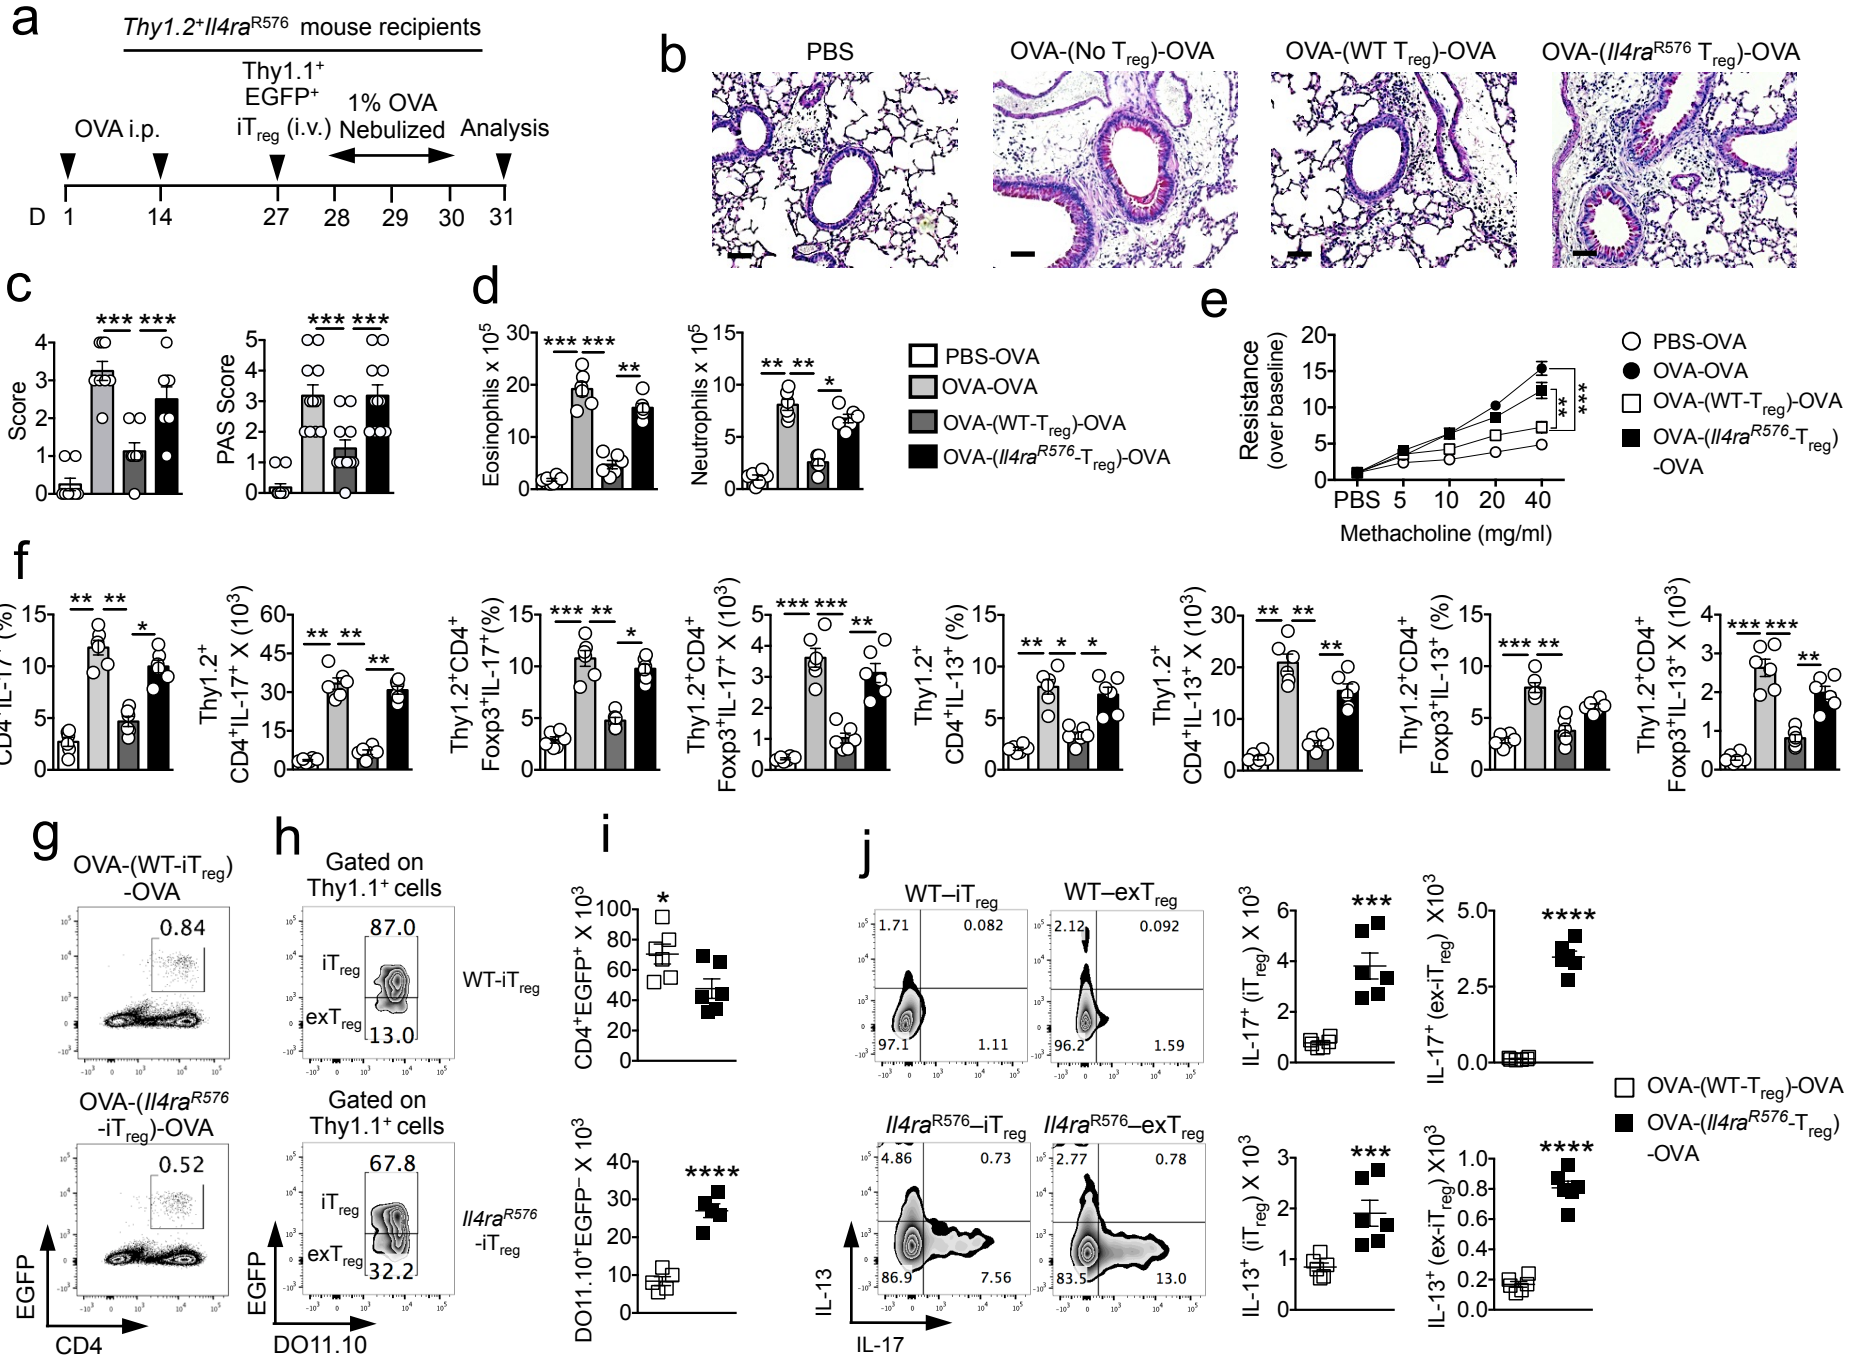

# Supplementary Figure 6

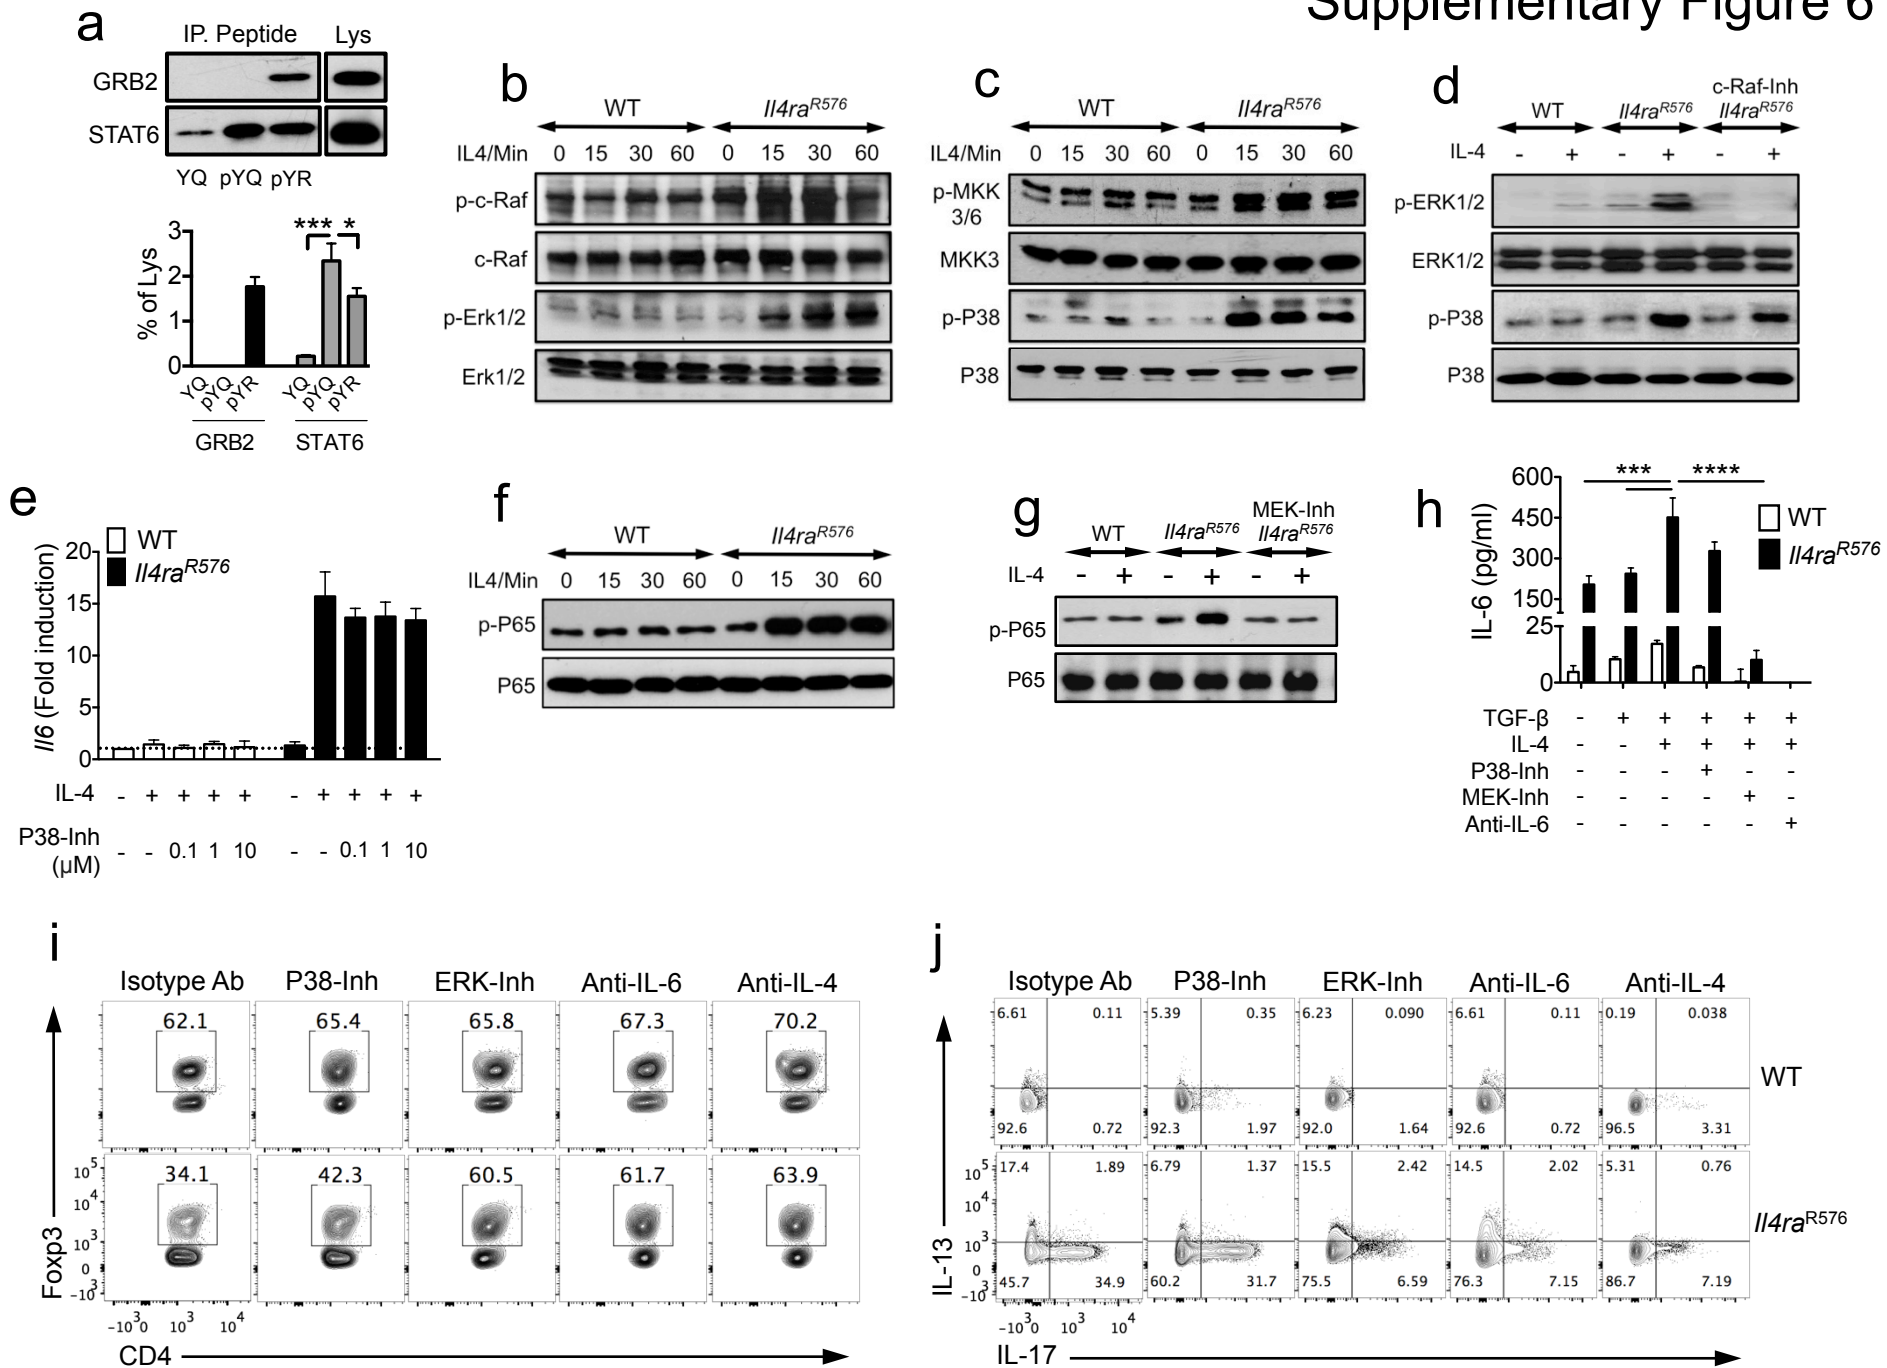

# Supplementary Figure 7

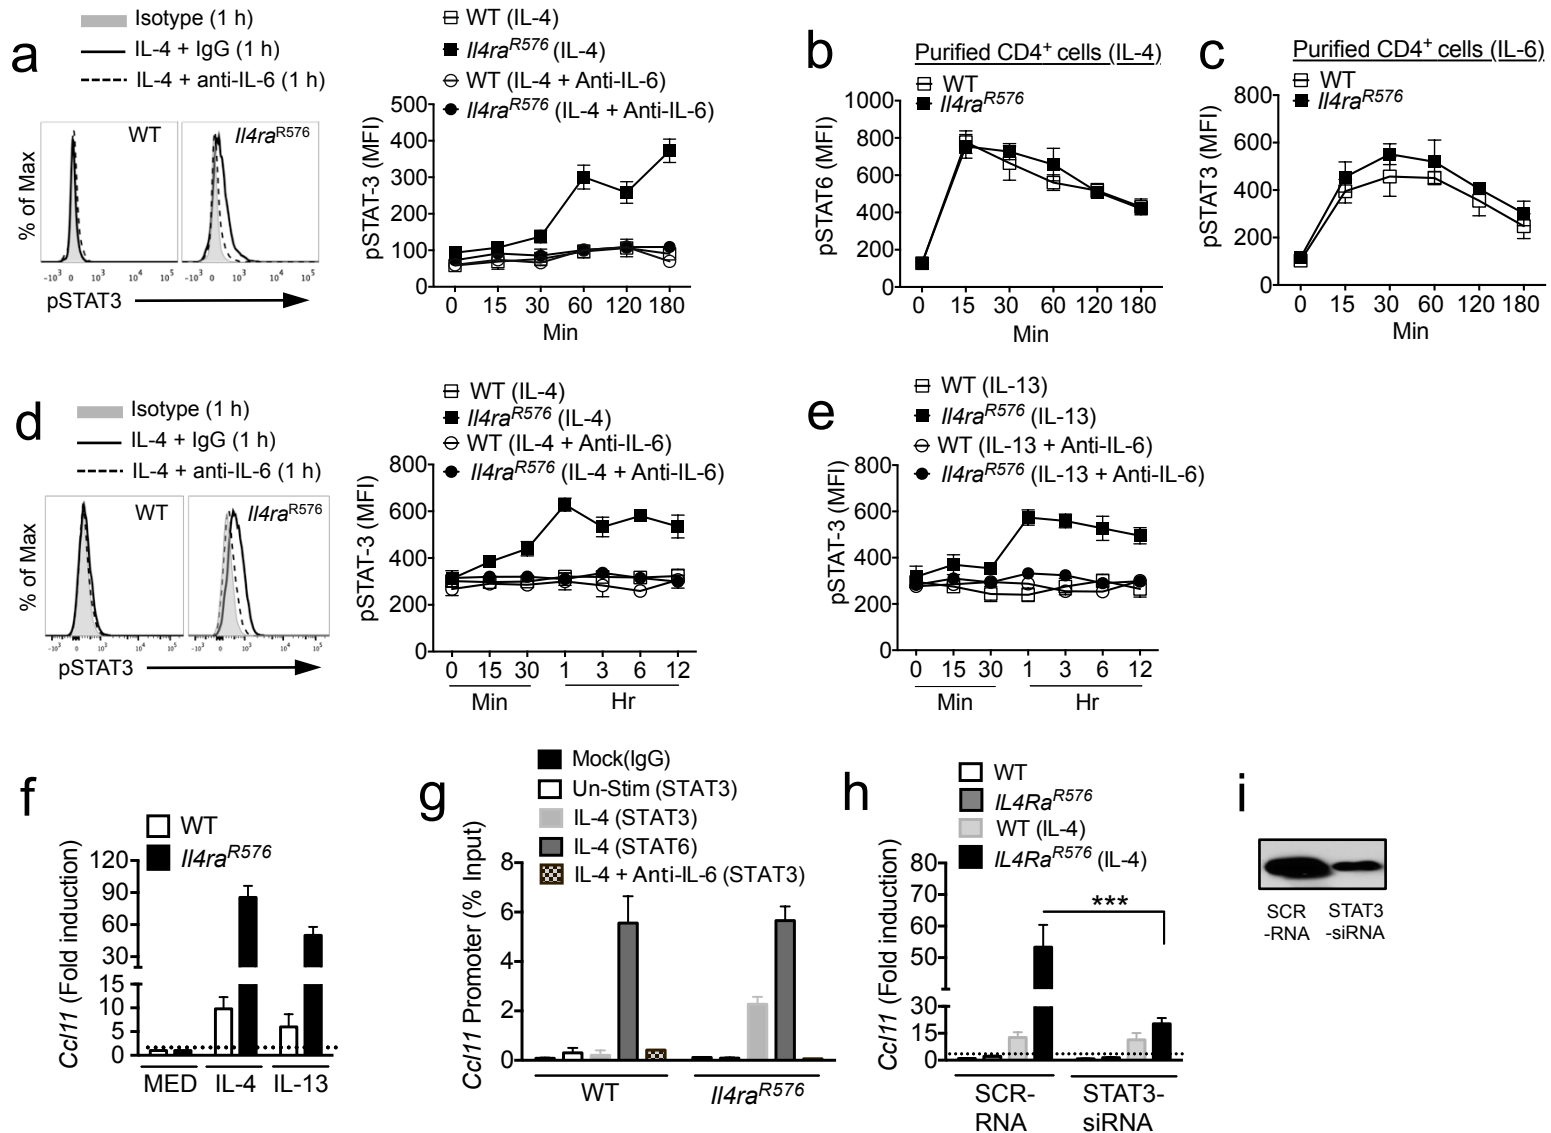

# Supplementary Figure 8

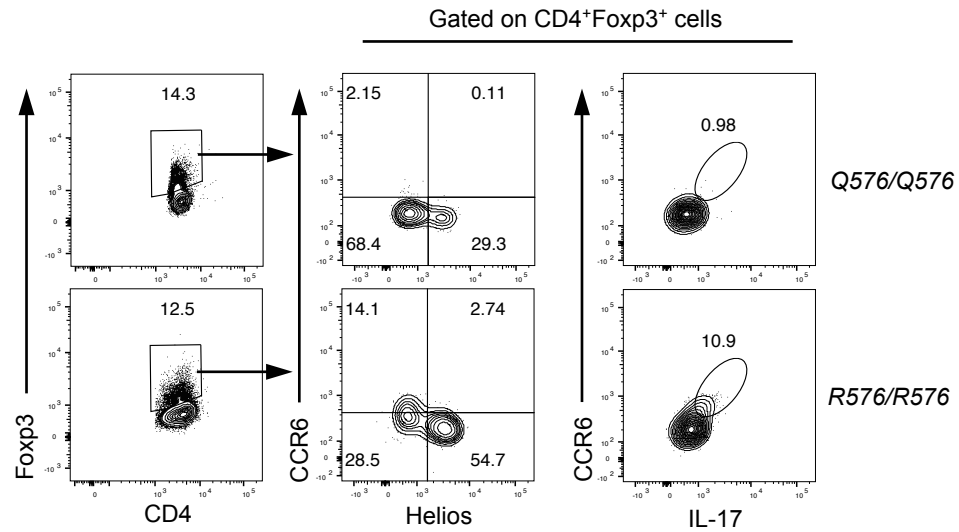



# Supplementary Figure 9

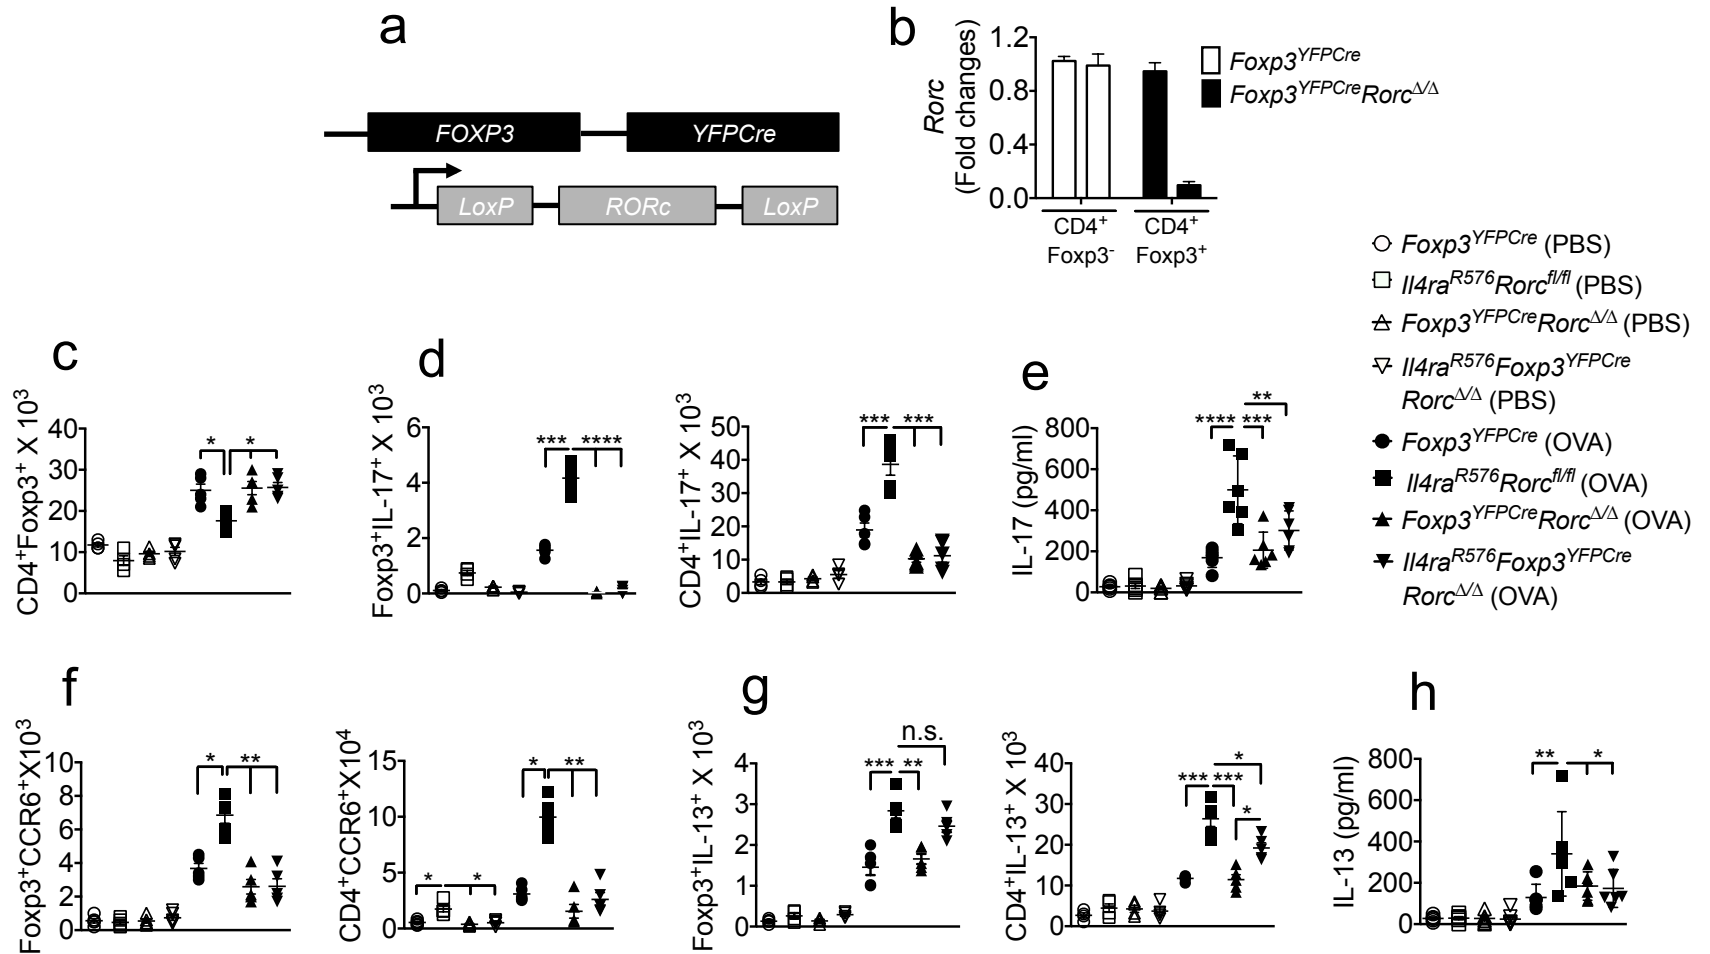

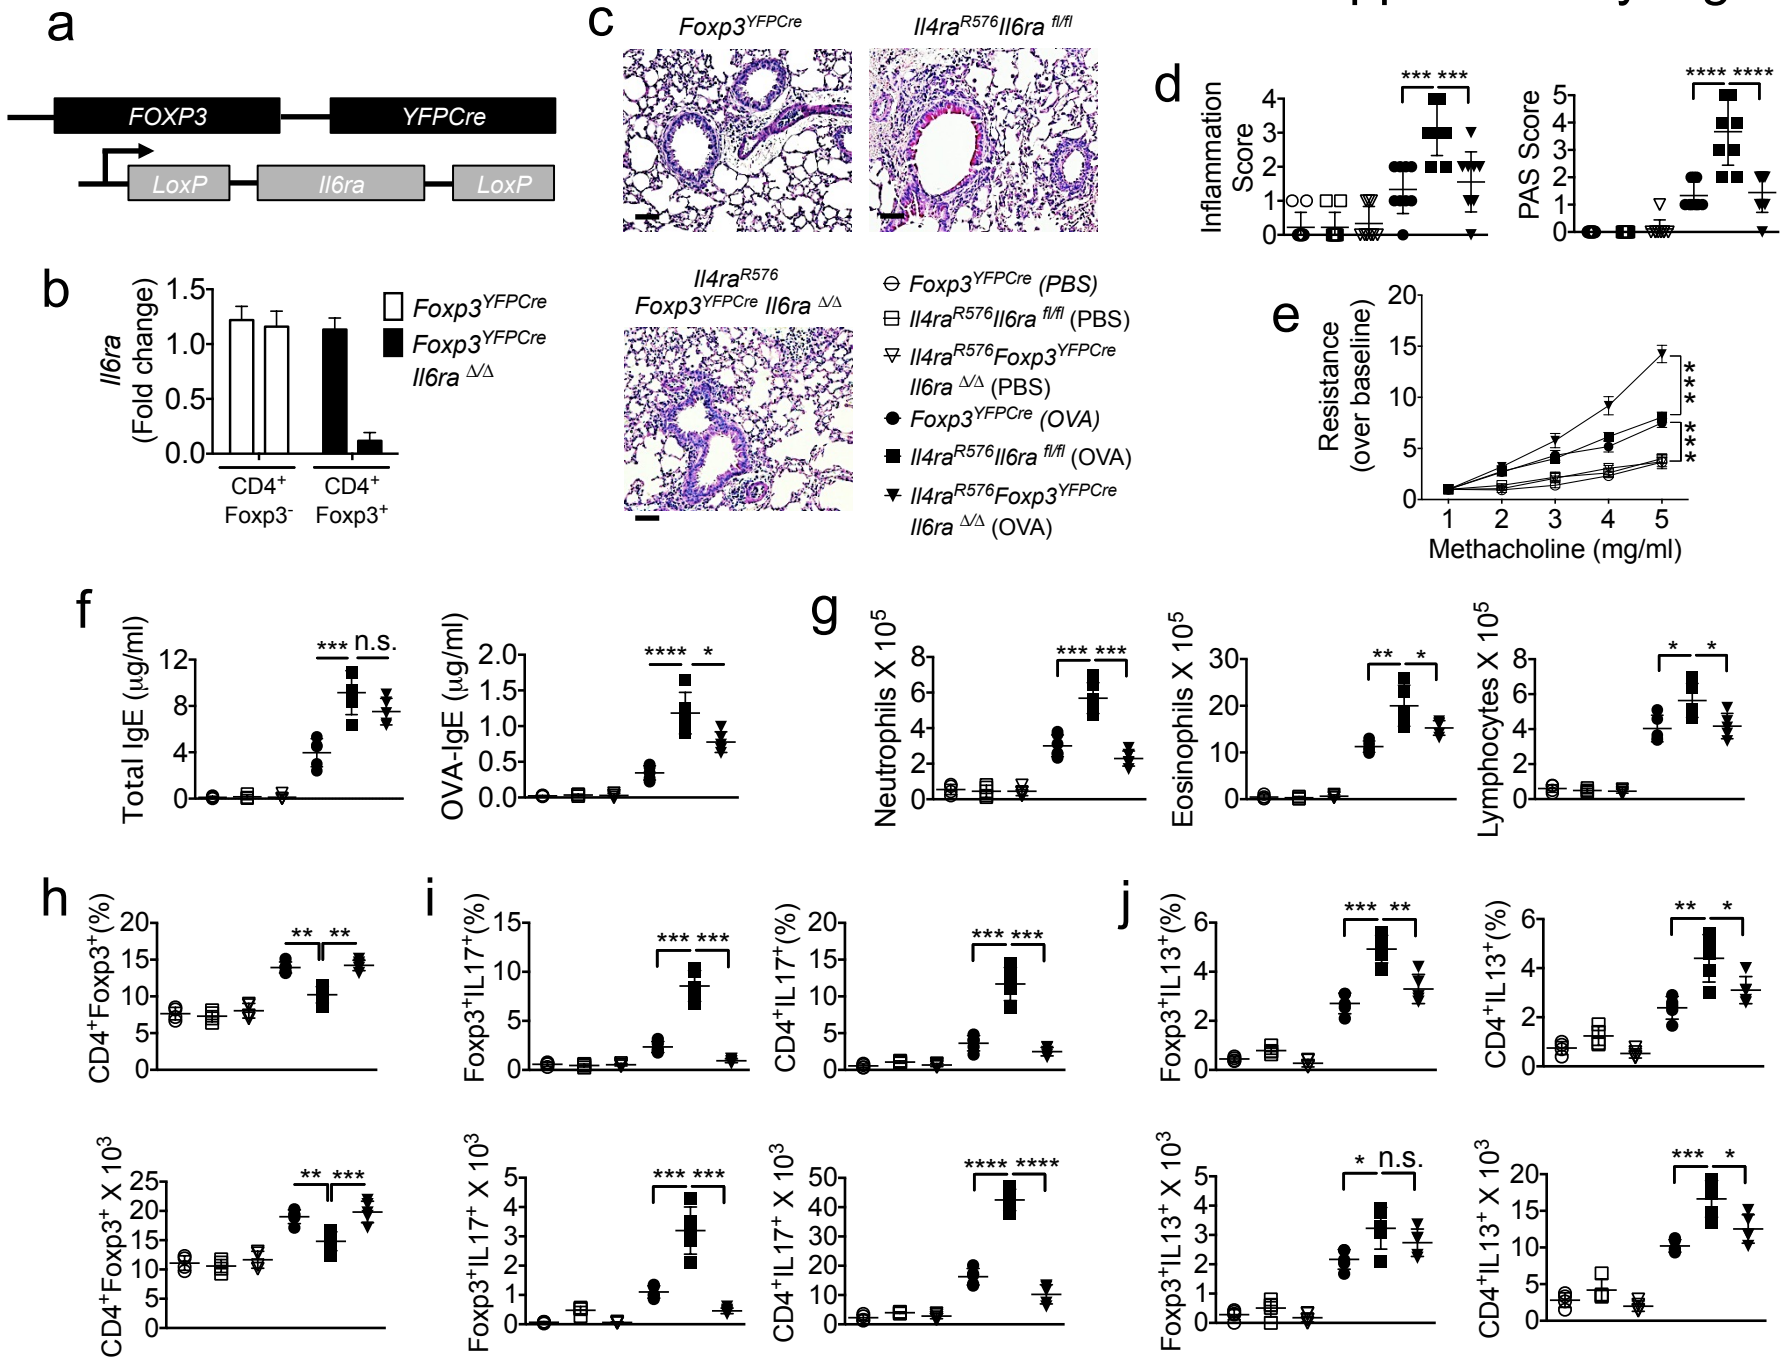

# Supplementary Figure 11

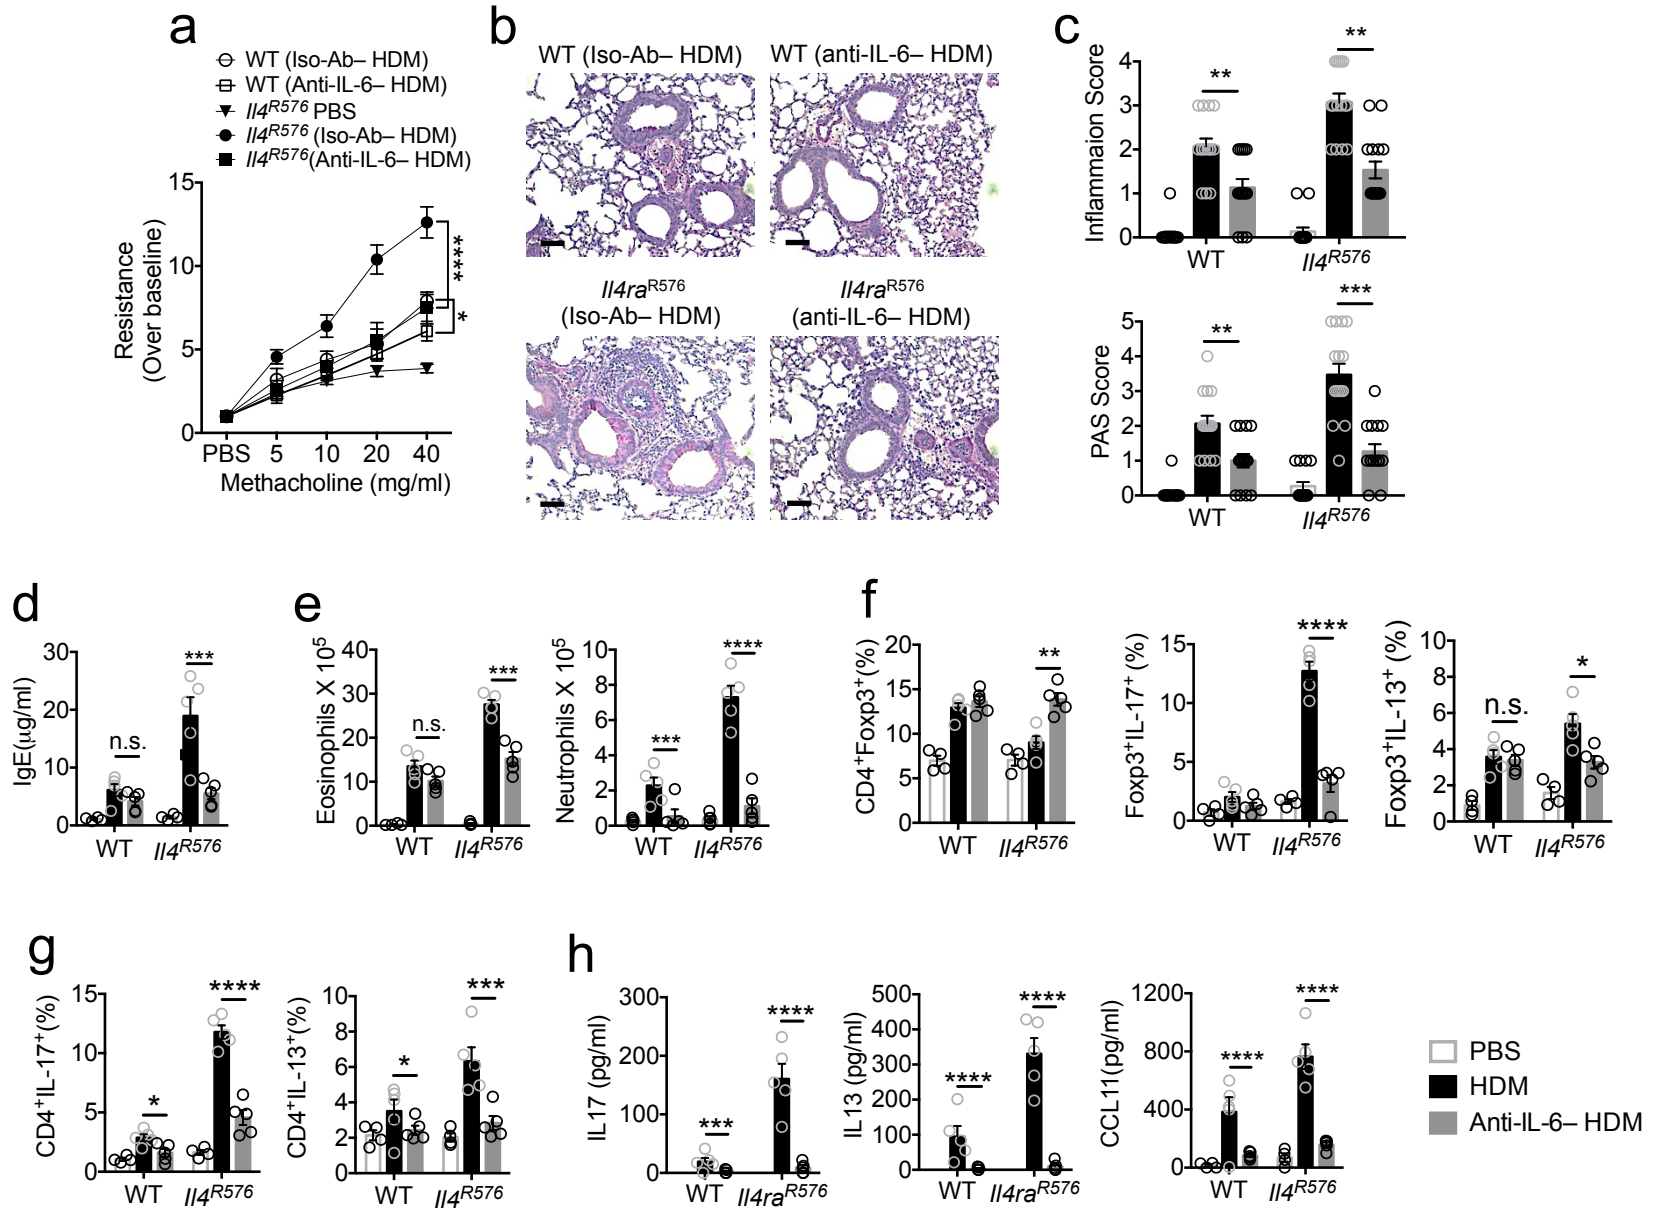

# Supplementary Figure 12

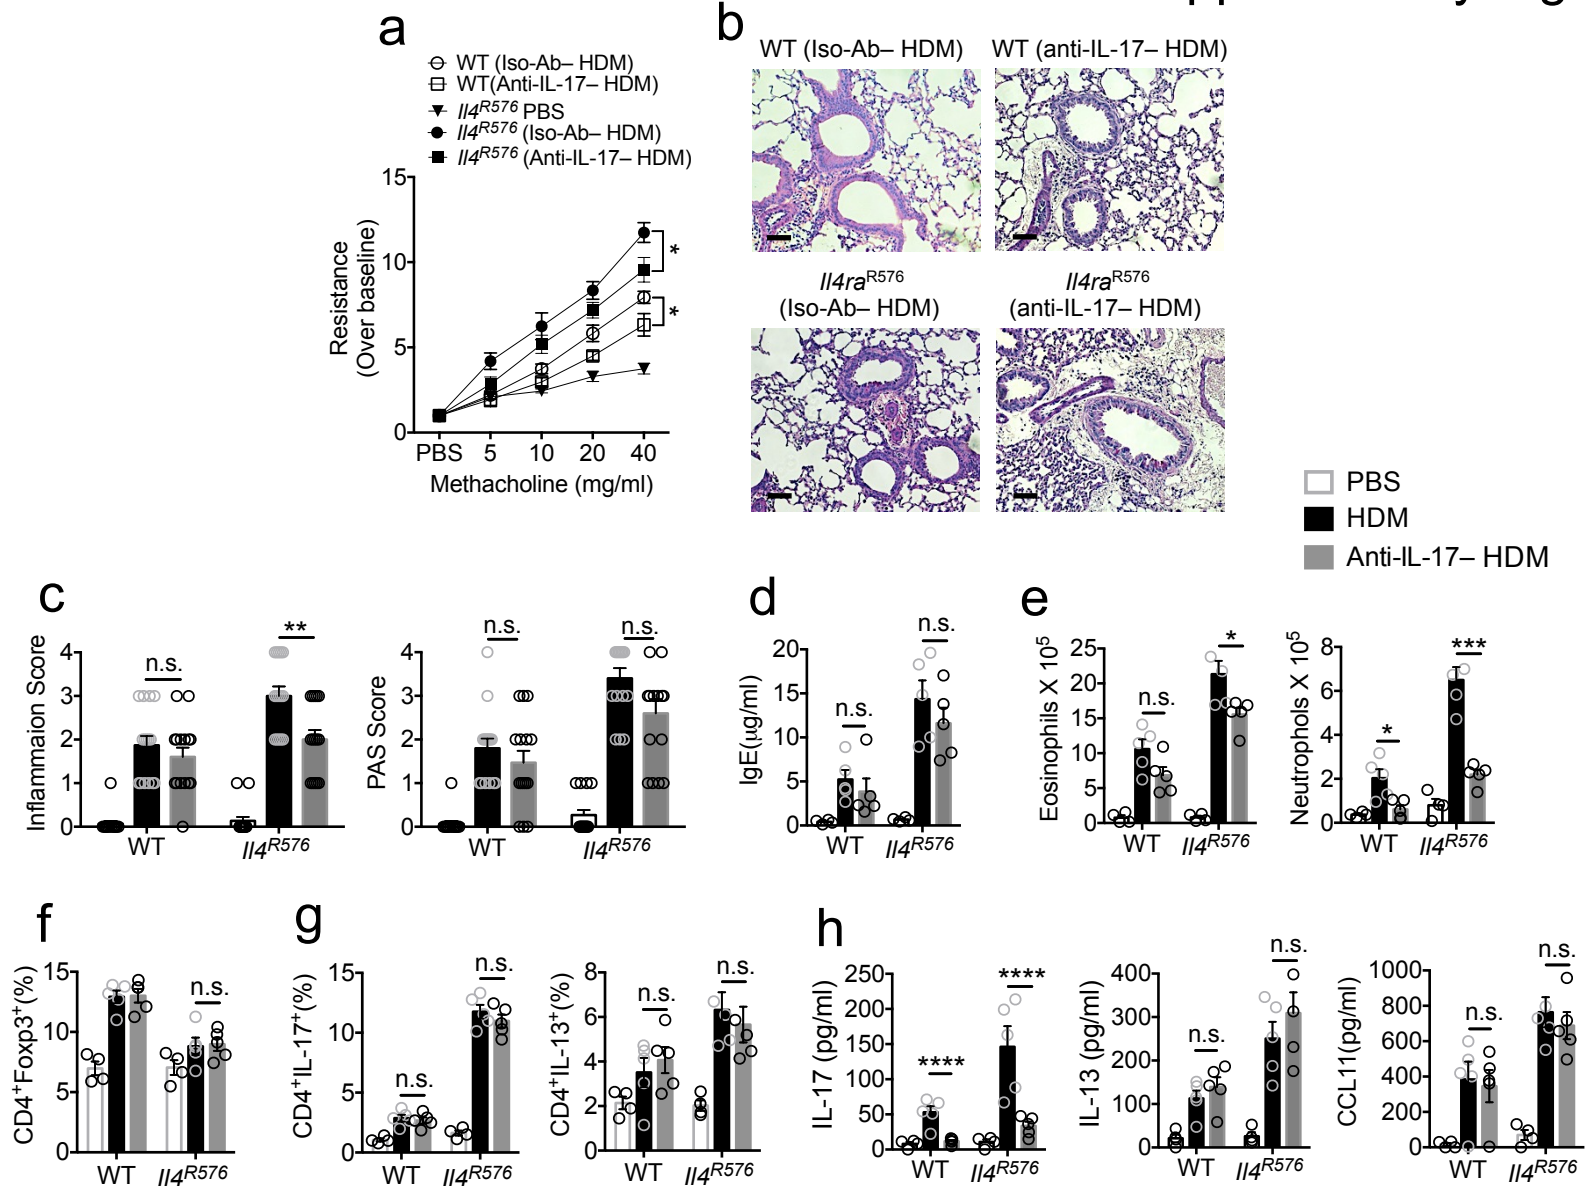

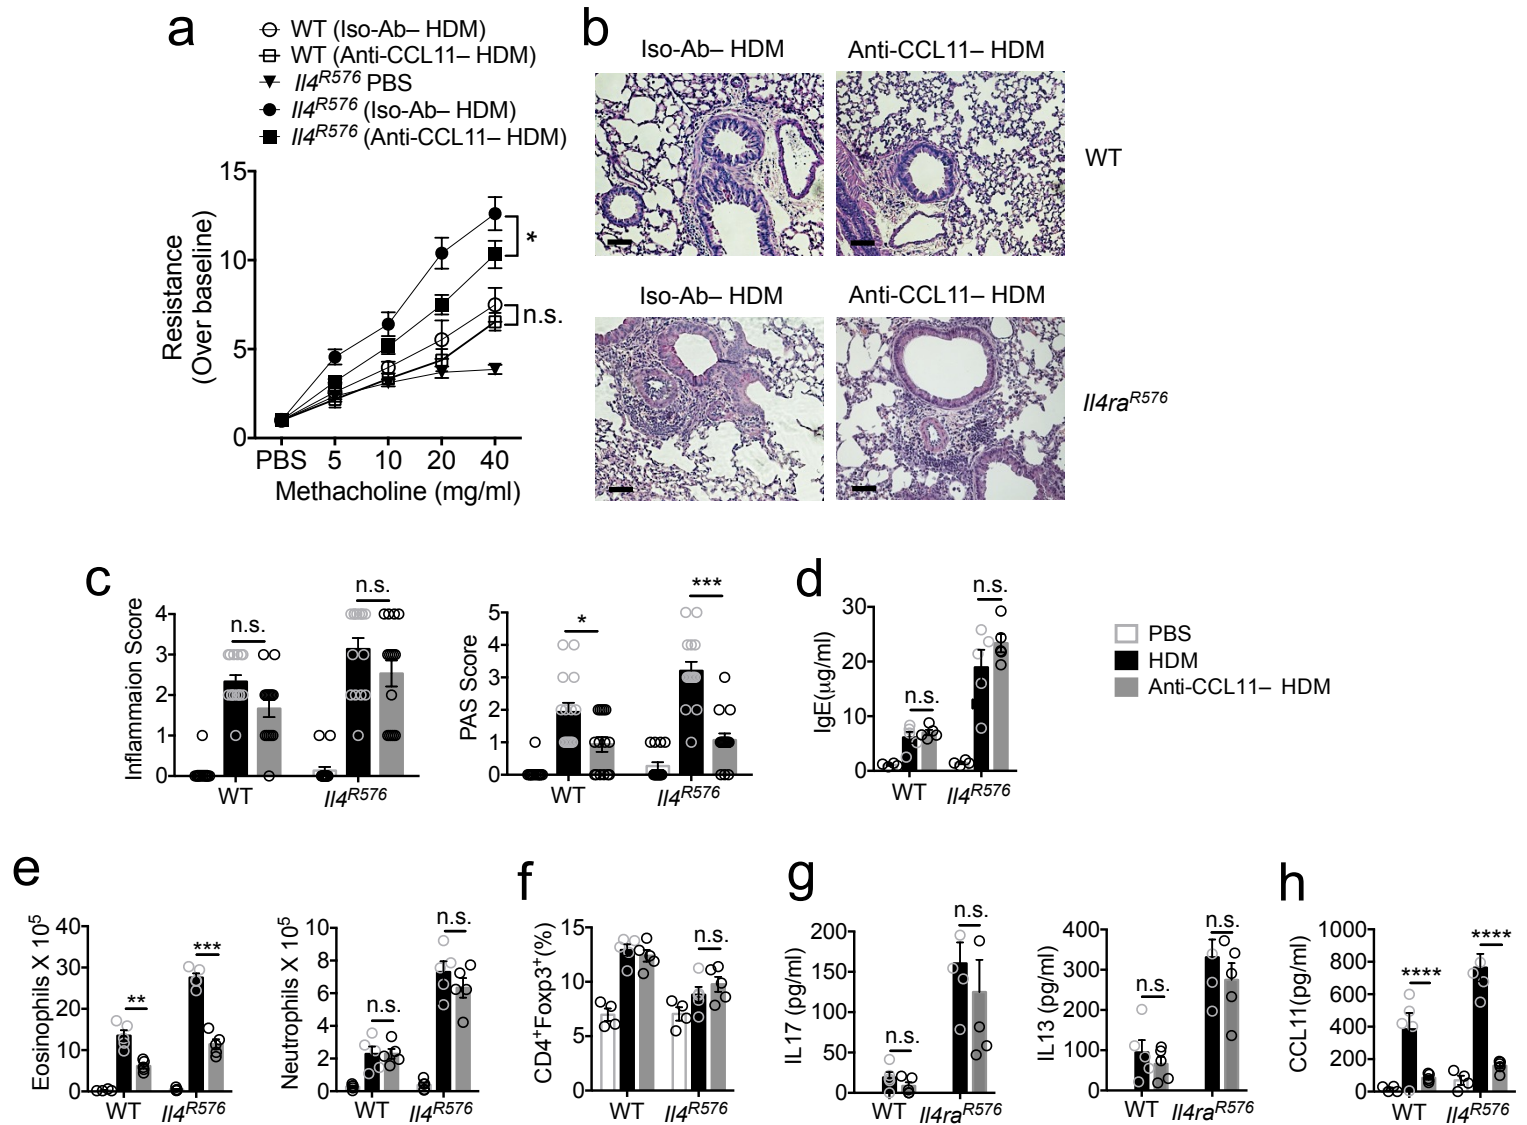

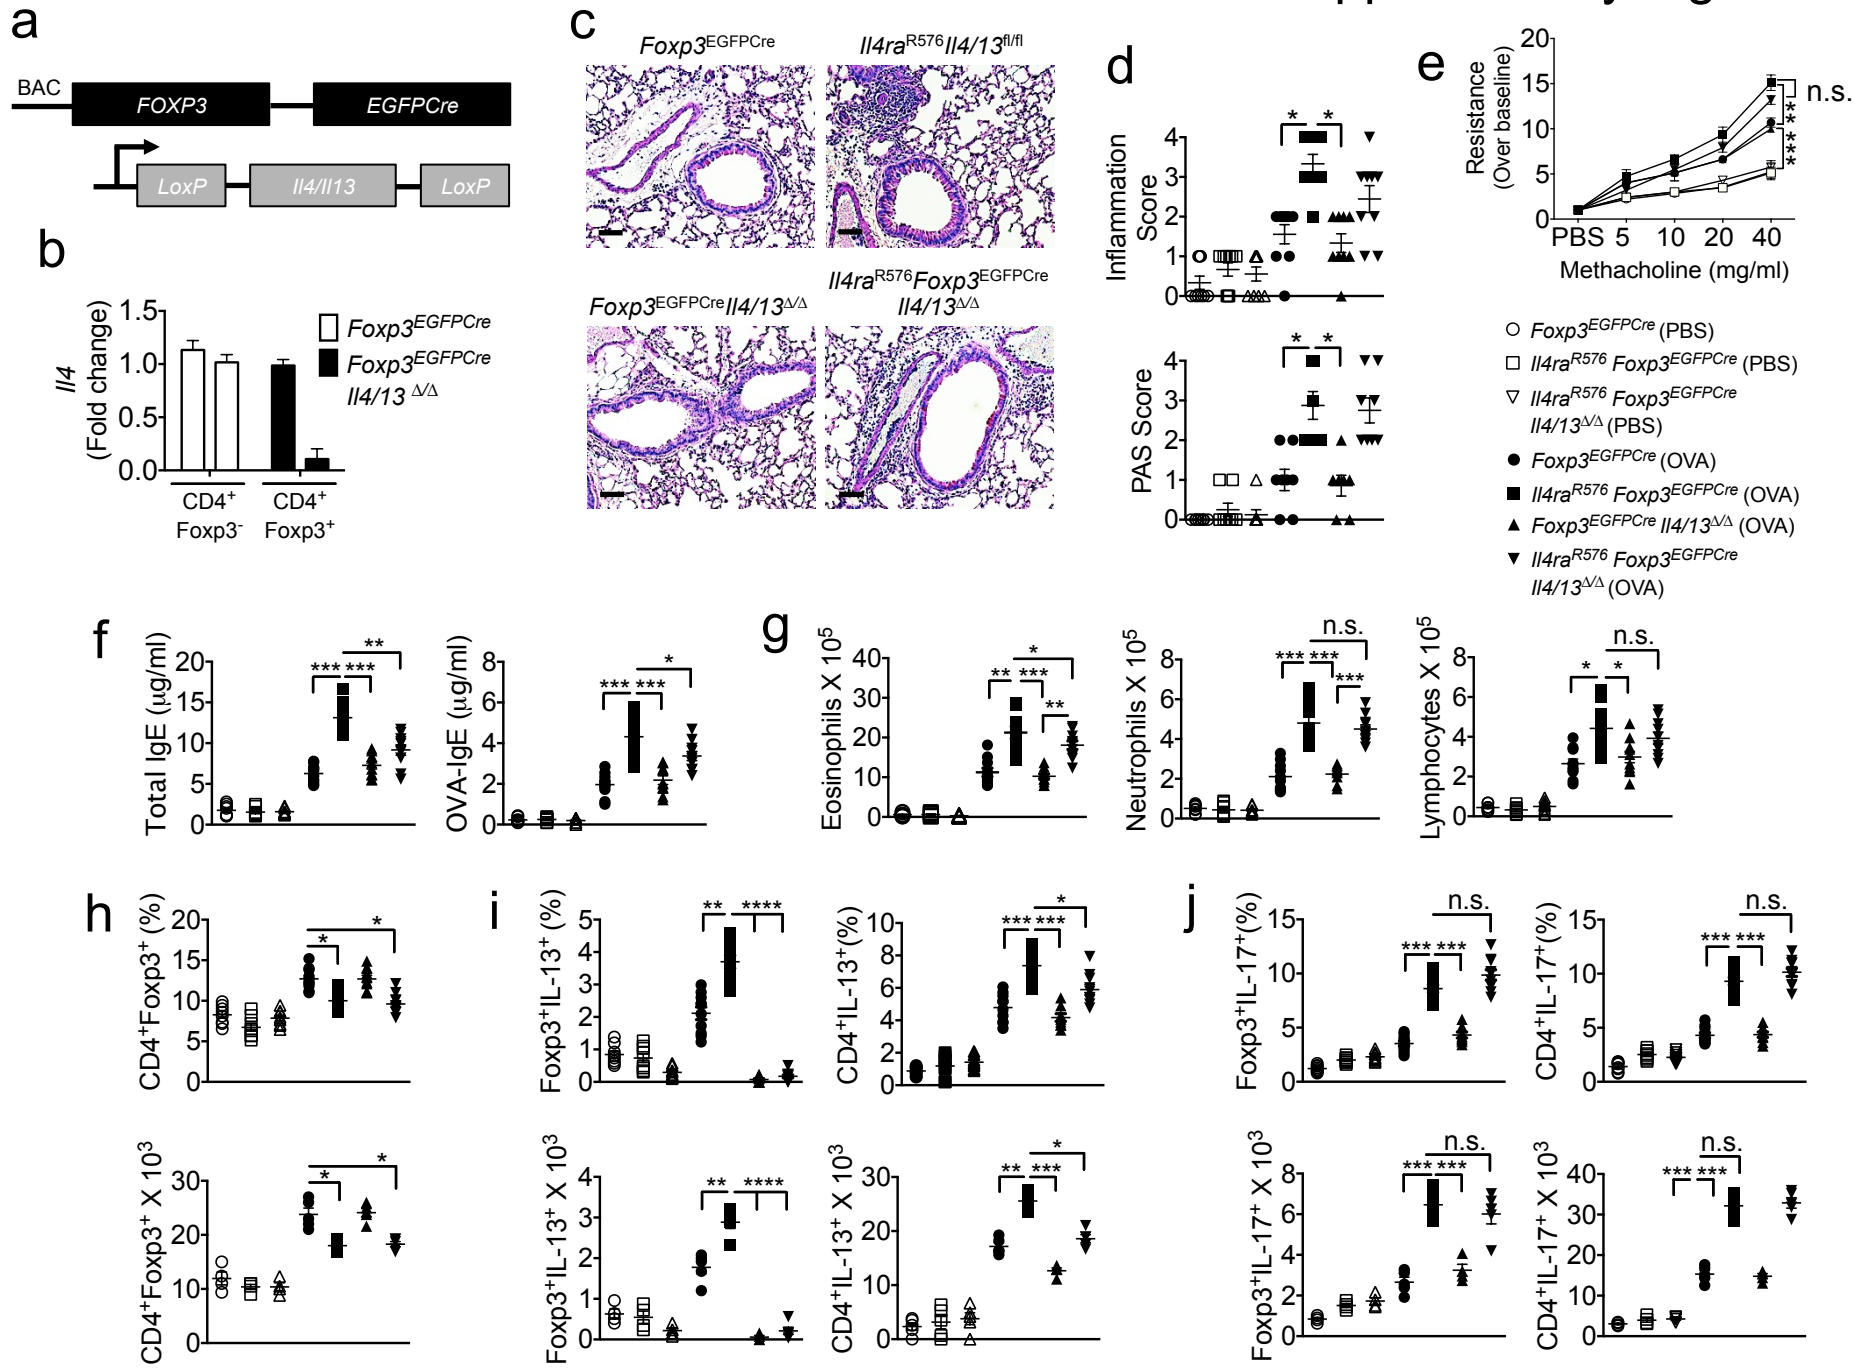

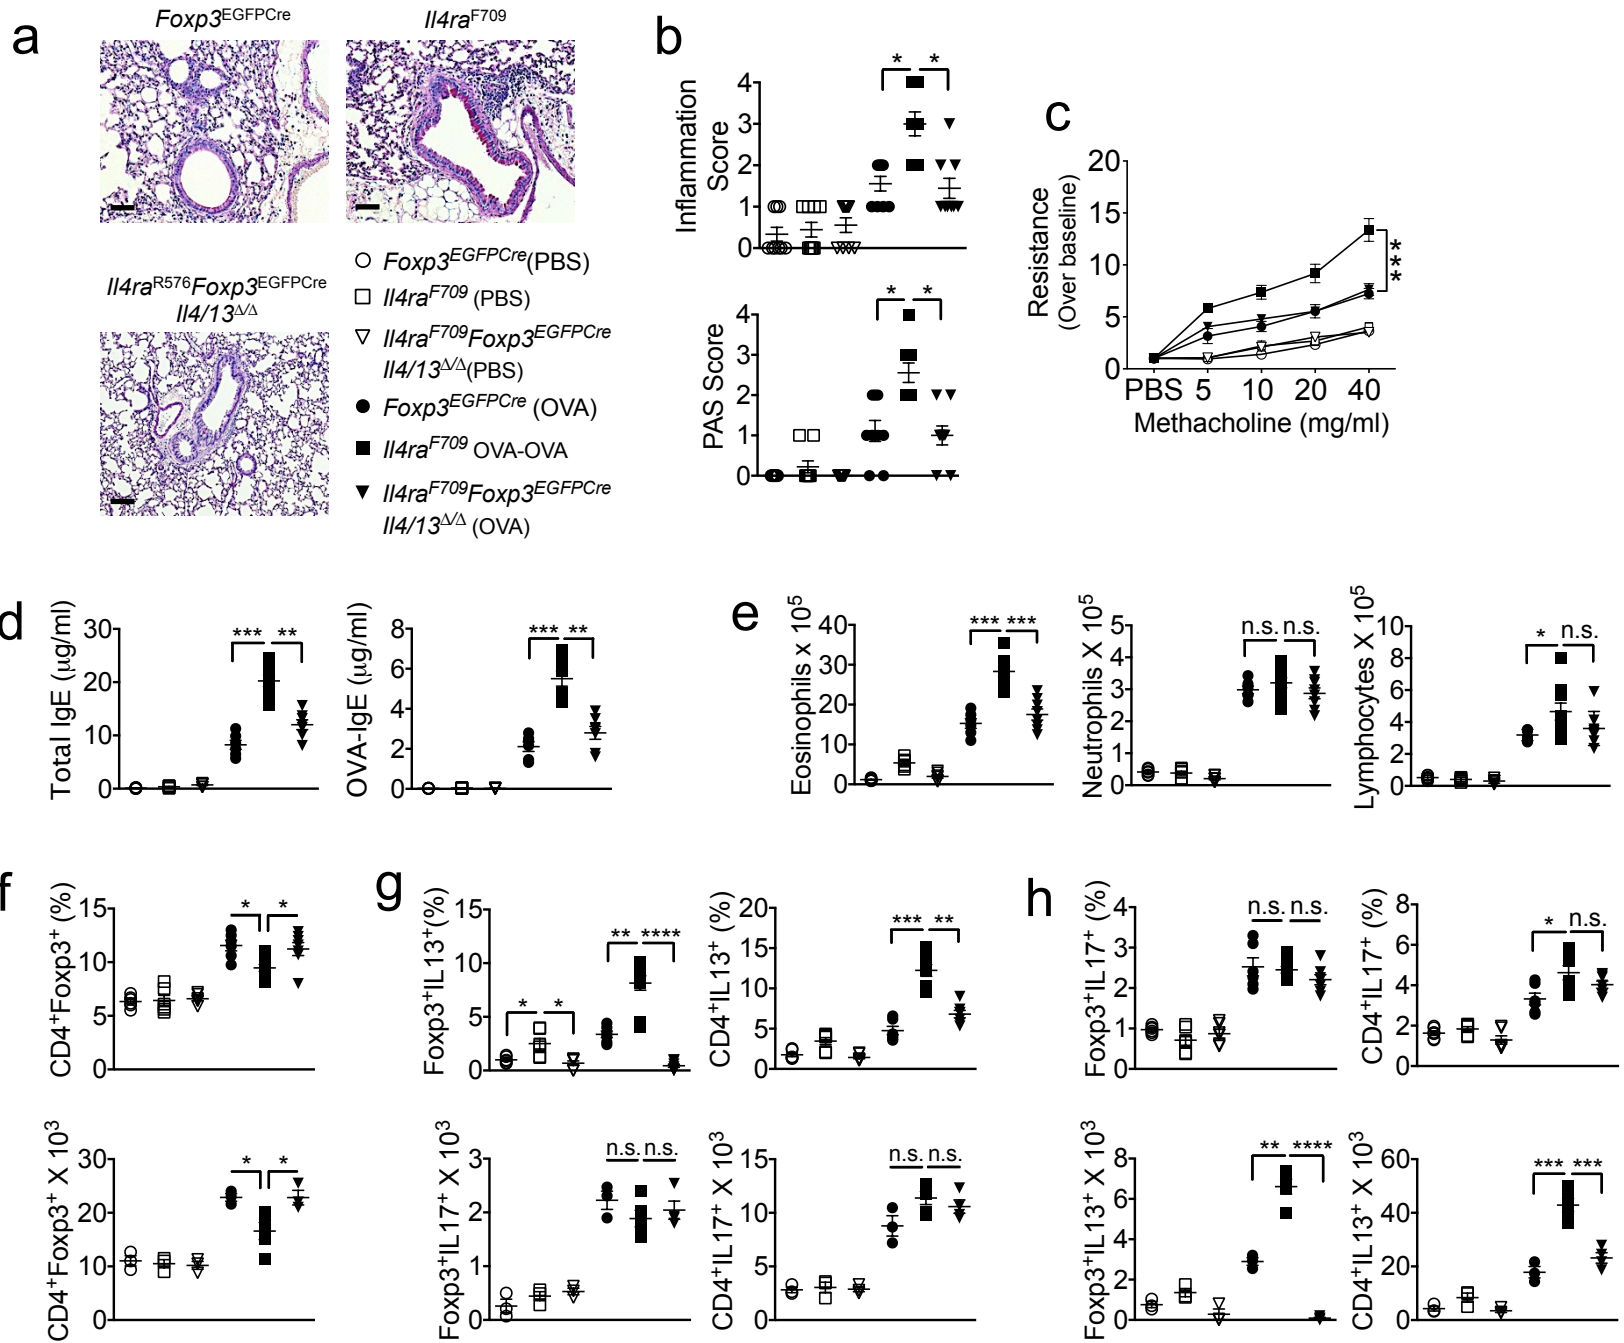

## Supplementary Figure Legends

**Supplementary Figure 1** *I4ra*<sup>R576</sup> polymorphism promotes the acquisition by lung tissue T<sub>reg</sub> cells of T<sub>H</sub>2 and T<sub>H</sub>17 cell-like phenotypes. **(a,b)** Flow cytometric analysis of IL-17 vs. IL-13 **(a)** and IL-6 vs. IL-17 **(b)** cytokine expression in WT and *I4ra*<sup>R576</sup> Foxp3<sup>+</sup> T<sub>reg</sub> cells within lung tissues of the HDM-treated mouse groups. **(c)** IL-4, IL-5, IL-13, IL-17 and IFN- $\gamma$  cytokine levels in BAL fluids of the respective mouse groups ( $n = 5$  mice for PBS- and 6 mice for HDM-treated groups). **(d–g)** Flow cytometric analysis, cell frequencies and absolute numbers of GATA3 **(d,e)** and ROR $\gamma$ t **(f,g)** expression in CD4<sup>+</sup> Foxp3<sup>-</sup> T<sub>conv</sub> and CD4<sup>+</sup> Foxp3<sup>+</sup> T<sub>reg</sub> cells within lung tissue of the same mouse groups shown in **c** ( $n = 5$  mice per group). **(h,i)** Flow cytometric analysis **(h)**, cell frequencies and absolute numbers **(i)** of IL-4 and IFN- $\gamma$  expression in CD4<sup>+</sup> T<sub>conv</sub> and CD4<sup>+</sup> Foxp3<sup>+</sup> T<sub>reg</sub> cells in lung tissues of the same mouse groups shown in **c** ( $n = 5$  mice per group). Each dot represents one mouse. Data represent means  $\pm$  s.e.m. from one experiment. \* $P < 0.05$ , \*\* $P < 0.01$  and \*\*\* $P < 0.001$  by one-way ANOVA with Bonferroni posttest analysis.

**Supplementary Figure 2** Characterization of cytokine production by CD4<sup>+</sup>Foxp3<sup>+</sup> iT<sub>reg</sub> and nT<sub>reg</sub> cells in HDM treated *I4ra*<sup>R576</sup> mice. **(a,b)** Flow cytometric analysis **(a)** and frequencies **(b)** Helios<sup>high</sup>Foxp3<sup>+</sup> and Helios<sup>low</sup>Foxp3<sup>+</sup> T<sub>reg</sub> cell populations in lung tissues of the respective mouse groups ( $n = 5$  mice per group). **(c,d)** Flow cytometric analysis **(c)** and frequencies **(d)** of CCR6 and IL-17 co-expression in CD4<sup>+</sup>Foxp3<sup>-</sup> T<sub>conv</sub> and CD4<sup>+</sup>Foxp3<sup>+</sup> T<sub>reg</sub> cells in lung tissues of the same mouse groups shown in **b** ( $n = 5$  mice per group). **(e,f)** Flow cytometric analysis **(e)** and frequencies **(f)** of CCR6, IL-17 or IL-13 vs. Helios co-expression in CD4<sup>+</sup>Foxp3<sup>+</sup> T<sub>reg</sub> cell populations in lung tissues of the



respective mouse groups ( $n = 5$  mice per group). Each dot represents one mouse. Data represent means  $\pm$  s.e.m. from one experiment.  $*P < 0.05$ ,  $**P < 0.01$ ,  $***P < 0.001$  and  $****P < 0.001$  by one-way ANOVA with Bonferroni posttest analysis.

**Supplementary Figure 3** Acquisition by *in vitro* derived  $Il4ra^{R576}$  iT<sub>reg</sub> cells of T<sub>H</sub>17 and T<sub>H</sub>2 cell-like attributes. **(a,b)** Flow cytometric analysis of ROR $\gamma$ t **(a)** and GATA3 **(b)** in naïve WT and  $Il4ra^{R576}$  cells treated with anti-CD3 + anti-CD28 mAbs in the absence or presence of TGF  $\beta$ 1 and TGF  $\beta$ 1 + IL-4. **(c-e)** Flow cytometric analysis **(c)** and frequencies **(d,e)** of IL-4 **(d)** and IL-13 **(e)** expression in naïve T cells activated with anti-CD3 + anti-CD28 mAbs in the absence or presence of TGF  $\beta$ 1, TGF  $\beta$ 1 + anti-IL-4 mAb, TGF  $\beta$ 1 + anti-IL-6 mAb and TGF  $\beta$ 1 + IL-4 ( $n = 6$  replicates). **(f-h)** Flow cytometric analysis **(f)** and frequencies **(g,h)** of IL-9 expression in CD4<sup>+</sup> Foxp3<sup>-</sup> T<sub>conv</sub> **(g)** and CD4<sup>+</sup>Foxp3<sup>+</sup> T<sub>reg</sub> cell populations **(h)** within naïve T cells activated with anti-CD3 + anti-CD28 mAbs in the absence or presence of TGF  $\beta$ 1 or TGF  $\beta$ 1 + IL-4 ( $n = 5$  replicates). Data represent means  $\pm$  s.e.m. from two independent experiments.  $***P < 0.001$  by one-way ANOVA with Bonferroni posttest analysis.

**Supplementary Figure 4**  $Il4^{R576}$  nT<sub>reg</sub> cells exhibit comparable phenotypic and functional characterization to the WT counterparts. **(a)** Flow cytometric analysis of WT-CD4<sup>+</sup>GFP<sup>-</sup> T<sub>conv</sub> and WT- or  $Il4^{R576}$ - CD4<sup>+</sup>GFP<sup>+</sup>Nrp1<sup>+</sup> T<sub>reg</sub> cells purity after purification by MACS bead and FACS. **(b,c)** Representative flow cytometric analysis **(b)** and frequencies **(c)** of proliferating WT-CD4<sup>+</sup> T (T<sub>eff</sub>) cells co-cultured with WT or  $Il4ra^{R576}$  Nrp1<sup>+</sup>CD4<sup>+</sup>Foxp3<sup>+</sup> nT<sub>reg</sub> cells added at the indicated ratios. Cultured cells were stimulated with anti-CD3 + anti-CD28 mAbs in the absence or presence of recombinant IL-4 or IL-4 and anti-IL-6 mAb and assessed for their proliferation by the dilution of a

proliferative dye ( $n = 3$  replicates). **(d,e)** Flow cytometric analysis **(d)** and frequencies **(e)** of IL-13 and IL-17 production by  $\text{Nrp1}^+\text{CD4}^+\text{Foxp3}^+$   $\text{nT}_{\text{reg}}$  cells that were isolated from spleens of naïve WT or  $\text{Il4ra}^{\text{R576}}$  mice and stimulated in culture with anti-CD3 + anti-CD28 mAbs in the absence or presence of recombinant IL-4 ( $n = 4$  replicates). **(e,f)** flow cytometric analyses **(f)** and quantification **(g)** of IL-13 and IL-17 production by naïve  $\text{CD4}^+\text{CD62L}^+\text{CD44}^- \text{T}_{\text{conv}}$  isolated from spleen of naïve WT or  $\text{Il4ra}^{\text{R576}}$  mice after culture with anti-CD3 + anti-CD28 mAb in the absence or presence of recombinant IL-4 ( $n = 5$  replicates). Data represent means  $\pm$  s.e.m. from two independent experiments.  $*P < 0.05$  and  $***P < 0.001$  by one-way ANOVA with Bonferroni posttest analysis. For suppression analyses by repeated measures two-way ANOVA.

**Supplementary Figure 5** Antigen-specific  $\text{Il4ra}^{\text{R576}}$   $\text{iT}_{\text{reg}}$  cells fail to protect against allergic airway inflammation. **(a)** Schema of the experimental design. *In vitro* derived WT or  $\text{Il4ra}^{\text{R576}}$   $\text{Thy1.1}^+\text{DO11.10}^+\text{Rag2}^{-/-}\text{Foxp3}^{\text{EGFP}^+}$   $\text{iT}_{\text{reg}}$  cells were adoptively transferred to OVA-sensitized  $\text{Thy1.2}^+\text{Il4ra}^{\text{R576}}$  mice prior to challenge with nebulized OVA. **(b)** PAS staining of lung sections isolated from the respective recipient mice (20 $\times$ , scale bar 50  $\mu\text{m}$ ). **(c)** Inflammation and PAS scores ( $n = 10$  counts per field-of-view) **(d)** absolute numbers of lung tissue eosinophils and neutrophils and **(e)** Methacholine-induced AHR in the respective mouse groups. **(f)** Frequencies and absolute numbers of endogenous ( $\text{Thy1.2}^+$ ) IL-13 and IL-17 producing  $\text{CD4}^+\text{Foxp3}^- \text{T}_{\text{eff}}$  and  $\text{CD4}^+\text{Foxp3}^+ \text{T}_{\text{reg}}$  cells in the lung tissues of the mouse groups shown in **d**. **(g,h)** Flow cytometric analysis of transferred  $\text{CD4}^+\text{EGFP}^+$   $\text{iT}_{\text{reg}}$  cells **(g)**,  $\text{DO11.10}^+ \text{EGFP}^+$  ( $\text{iT}_{\text{reg}}$ ) and  $\text{DO11.10}^+ \text{EGFP}^-$  ( $\text{exT}_{\text{reg}}$ ) cells gated on  $\text{Thy1.1}^+$  population **(h)**, all recovered from lung tissues of recipients of the mouse groups shown in **d**. **(i)** Absolute numbers of transferred  $\text{iT}_{\text{reg}}$  and

exT<sub>reg</sub> cells in lung tissues of the recipients. (j) Flow cytometric analysis and absolute numbers of IL-13 and IL-17 producing iT<sub>reg</sub> and exT<sub>reg</sub> cells within Thy1.1<sup>+</sup> population ( $n = 6$  mice per group for **c–j**). Data represent means  $\pm$  s.e.m. from 2 independent experiments. \* $P < 0.05$ , \*\* $P < 0.01$ , \*\*\* $P < 0.001$  and \*\*\*\* $P < 0.0001$  by one-way ANOVA with Bonferroni posttest analysis. For AHR analysis, \*\* $P < 0.01$  and \*\*\* $P < 0.001$  by repeated measures two-way ANOVA.

**Supplementary Figure 6** IL-4R $\alpha$ -R576 activates GRB2-coupled MAPK cascades. (a) Binding of GRB2 and STAT6 in human PBMC lysates to the indicated biotinylated human IL-4R $\alpha$  peptides as revealed by immunoblotting and quantified by densitometry ( $n = 3$  replicates). (b,c) Time course of MAPK activation in *Il4ra*<sup>R576</sup> and WT splenocytes stimulated with IL-4 for the indicated times and probed for p-c-Raf, p-ERK1/2 (b), p-MKK3/MKK6, p-P38 (c) and their corresponding non-phosphorylated proteins. (d) IL-4R $\alpha$ -R576-mediated activation of ERK1/2 but not p38 MAPK is c-Raf-dependent. Cell lysates of IL-4-treated WT, *Il4ra*<sup>R576</sup> or c-Raf inhibitor (c-Raf-Inh)-treated *Il4ra*<sup>R576</sup> splenocytes were immunoblotted for the respective unmodified and phosphorylated proteins. (e) RT-PCR analysis of *Il6* transcripts in WT and *Il4ra*<sup>R576</sup> splenocytes either untreated or treated with IL-4 in the presence of graded concentrations of p38-Inh ( $n = 3$  replicates). (f,g) IL-4R $\alpha$ -R576 mediates sustained NF- $\kappa$ B p65 phosphorylation in an ERK1/2-dependent manner. Splenocytes were stimulated with IL-4 in the absence (f) or presence (g) of MEK-Inh and immunoblotted for NF- $\kappa$ B p-p65 and p65. (h) IL-6 production in the cultures of differentiated iT<sub>reg</sub> cells for the indicated treated groups ( $n = 3$  replicates). (i) Flow cytometric analysis of WT and *Il4ra*<sup>R576</sup> iT<sub>reg</sub> cells differentiated from naïve CD4<sup>+</sup> T<sub>conv</sub> cells in the presence of MEK-Inh (50  $\mu$ M) or p38-Inh (10  $\mu$ M),

anti-IL-4 or anti-IL-6 mAb, as indicated. (j) IL-17 and IL-13 expression in WT and *Il4ra*<sup>R576</sup> iT<sub>reg</sub> cells treated as in (j). Data represent means ± s.e.m. from 2–3 independent experiments. \*\*\**P* < 0.001 and \*\*\*\**P* < 0.0001 by one-way ANOVA with Bonferroni posttest analysis.

**Supplementary Figure 7** IL-4R $\alpha$ -R576 mediates sustained STAT3 activation in T cells and BMDM in an IL-6–dependent manner. (a) Flow cytometric analysis and MFI (right panel) of pSTAT3 expression in WT and *Il4ra*<sup>R576</sup> naïve CD4<sup>+</sup> T cells stimulated with IL-4 in the absence or presence of non-specific IgG or anti-IL-6 mAb for 1 h or indicated times. (b,c) MFI of pSTAT3 (b) and pSTAT6 (c) in WT and *Il4ra*<sup>R576</sup> naïve CD4<sup>+</sup> T cells stimulate with IL-6 or IL-4 respectively. (d) Flow cytometric analysis and MFI (right panel) of pSTAT3 in WT and *Il4ra*<sup>R576</sup> BMDM stimulated with IL-4 in the presence of non-specific IgG or anti-IL-6 mAb, for 1 h or indicated times. (e) MFI of pSTAT3 in WT and *Il4ra*<sup>R576</sup> BMDM treated with IL-13 for the indicated times (*n* = 5 replicates for a–e). (f) RT-PCR analysis of *Ccl11* transcripts in WT and *Il4ra*<sup>R576</sup> BMDM with indicated treatment. (g) ChIP analysis of STAT3 and STAT6 occupancy on *Ccl11* promoter in WT or *Il4ra*<sup>R576</sup> BMDM either untreated or treated for 2 hr with IL-4 or IL-4 + anti-IL-6. (h) RT-PCR analysis of *Ccl11* transcripts in scrambled- or *Stat3* siRNA- treated BMDM either untreated or treated with IL-4 (30 min) (*n* = 3 replicates for h–j). (i) Representative STAT3 protein expression in scrambled- or *Stat3* siRNA treated BMDM, determined by immunoblotting. Results represent means ± s.e.m. from 1–2 independent experiments. \*\*\**P* < 0.001 by one-way ANOVA with Bonferroni posttest analysis.

**Supplementary Figure 8** Gating strategy of identification of T<sub>reg</sub> cell subpopulations in peripheral blood mononuclear cells (PBMC) of asthmatic human subjects. PBMCs of

asthmatic Q576/Q576 and R576/R576 subjects were analyzed by flow cytometry. Gated CD4<sup>+</sup>Foxp3<sup>+</sup> T cells were further analyzed for Helios v.s. CCR6 and CCR6 v.s. IL-17 expression, as shown.

**Supplementary Figure 9** Characterization of allergic airway inflammation in WT and *Il4ra*<sup>R576</sup> mice with T<sub>reg</sub> cell lineage-specific deletion of *Rorc*. (a) Scheme for the generation of *Foxp3*<sup>YFPCre</sup>*Rorc*<sup>Δ/Δ</sup> mice. (b) RT-PCR analysis of *Rorc* mRNA transcripts in CD4<sup>+</sup>Foxp3<sup>-</sup> T<sub>conv</sub> and CD4<sup>+</sup>Foxp3<sup>+</sup> T<sub>reg</sub> cells of *Foxp3*<sup>YFPCre</sup> and *Foxp3*<sup>YFPCre</sup>*Rorc*<sup>Δ/Δ</sup> mice (*n* = 3 mice). (c) Absolute numbers of CD4<sup>+</sup>Foxp3<sup>+</sup> T<sub>reg</sub> cells in lung tissues of the respective mouse groups (d) Absolute numbers of IL-17 producing CD4<sup>+</sup>Foxp3<sup>+</sup> T<sub>reg</sub> and CD4<sup>+</sup>Foxp3<sup>-</sup> T<sub>conv</sub> cells. (e) IL-17 concentrations in BAL fluids of the respective mouse groups. (f) Absolute numbers of CCR6-expressing CD4<sup>+</sup>Foxp3<sup>+</sup> T<sub>reg</sub> and CD4<sup>+</sup>Foxp3<sup>-</sup> T<sub>conv</sub> cells. (g) Absolute numbers of IL-13 producing CD4<sup>+</sup>Foxp3<sup>+</sup> T<sub>reg</sub> and CD4<sup>+</sup>Foxp3<sup>-</sup> T<sub>conv</sub> cells. (h) IL-13 concentrations in BAL fluids of the respective mouse groups within lung tissues of the respective mouse groups (*n* = 4 mice for PBS- and 5 mice for OVA-treated groups for c–h). Each dot represents one mouse. Results represent means ± s.e.m. from one to two experiments. \**P* < 0.05, \*\**P* < 0.01, \*\*\**P* < 0.001 and \*\*\**P* < 0.001 by one-way ANOVA with Bonferroni posttest analysis.

**Supplementary Figure 10** Specific deletion of *Il6ra* in Foxp3<sup>+</sup> T<sub>reg</sub> cells of *Il4ra*<sup>R576</sup> mice reduces induced airway inflammation to those of WT counterparts. (a) Scheme for the generation of *Foxp3*<sup>YFPCre</sup>*Il6ra*<sup>Δ/Δ</sup> mice. (b) RT-PCR analysis of *Il6ra* mRNA transcripts in sorted CD4<sup>+</sup>Foxp3<sup>-</sup> T<sub>conv</sub> and CD4<sup>+</sup>Foxp3<sup>+</sup> T<sub>reg</sub> cells of *Foxp3*<sup>YFPCre</sup> and *Foxp3*<sup>YFPCre</sup>*Il6ra*<sup>Δ/Δ</sup> mice (*n* = 3 mice). (c) PAS staining of lung sections of *Foxp3*<sup>YFPCre</sup>, *Il4ra*<sup>R576</sup>*Il6ra*<sup>fl/fl</sup>, *Il4ra*<sup>R576</sup>*Foxp3*<sup>EGFPCre</sup>*Il6ra*<sup>Δ/Δ</sup> mice immunized and challenged with OVA

(20×, scale bar 50 μm). (d) Inflammation and PAS scores ( $n = 11$  counts per field-of-view). (e) Methacholine-induced AHR. (f) Total and OVA-specific serum IgE concentrations. (g) Frequencies of lung tissue eosinophils, neutrophils and lymphocytes. (h–j) Frequencies and absolute numbers of Foxp3<sup>+</sup> T<sub>reg</sub> cells (h), IL-13 (i) and IL-17 (j) producing Foxp3<sup>+</sup>T<sub>reg</sub> and CD4<sup>+</sup>T<sub>conv</sub> cells in lung tissues of respective mouse groups. Results represent means ± s.e.m. from one experiment ( $n = 4$  for PBS- and 5 for OVA-treated groups for e–j). \* $P < 0.05$ , \*\* $P < 0.01$ , \*\*\* $P < 0.001$  and \*\*\*\* $P < 0.0001$  by one-way ANOVA with Bonferroni posttest analysis. For AHR analyses, \*\*\* $P < 0.001$  by repeated measures two-way ANOVA.

**Supplementary Figure 11** Treatment with a neutralizing anti-IL-6 mAb abrogated the aggravated HDM-induced airway inflammation and AHR in *Il4ra*<sup>R576</sup> mice. (a) Methacholine-induced AHR in PBS- and HDM-treated WT and *Il4ra*<sup>R576</sup> mice that received either anti-IL-6 or isotype control mAb prior to antigen-challenge. (b) PAS staining of lung sections (20×, scale bar 50 μm). (c) Inflammation and PAS scores ( $n = 10$  counts per field-of-view). (d) Total serum IgE concentration. (e) Absolute numbers of lung tissue eosinophils and neutrophils. (f) Frequencies of CD4<sup>+</sup>Foxp3<sup>+</sup>, Foxp3<sup>+</sup>IL-17<sup>+</sup> and Foxp3<sup>+</sup>IL-13<sup>+</sup> T<sub>reg</sub> cells in lung tissue of the respective groups. (g) Frequencies of lung tissue CD4<sup>+</sup>IL-17<sup>+</sup> and CD4<sup>+</sup>IL-13<sup>+</sup> T<sub>conv</sub> cells. (h) IL-17, IL-13 and CCL11 cytokines levels in BAL fluids of respective treated groups ( $n = 4$  for PBS- and 5 for HDM-treated groups). Data represent means ± s.e.m. from two independent experiments. \* $P < 0.05$ , \*\* $P < 0.01$ , \*\*\* $P < 0.001$  and \*\*\*\* $P < 0.0001$  by one-way ANOVA with Bonferroni posttest analysis. For AHR analyses, \* $P < 0.05$  and \*\*\*\* $P < 0.0001$  by repeated measures two-way ANOVA.

**Supplementary Figure 12** Treatment with a neutralizing anti-IL-17 mAb partially reverses the augmentation in HDM-induced airway inflammation and AHR in *Il4ra*<sup>R576</sup> mice. Methacholine-induced AHR in PBS and HDM-treated WT and *Il4ra*<sup>R576</sup> mice that received either anti-IL-17 or isotype control mAb prior to antigen-challenge. **(b)** PAS staining of lung sections (20×, scale bar 50 μm). **(c)** Inflammation and PAS scores ( $n = 10$  counts per field-of-view). **(d)** Total serum IgE concentration. **(e)** Absolute numbers of lung tissue eosinophils and neutrophils. **(f)** Frequencies of lung tissue Foxp3<sup>+</sup> T<sub>reg</sub> cells. **(g)** Frequencies of lung tissue CD4<sup>+</sup>IL-17<sup>+</sup> and CD4<sup>+</sup>IL-13<sup>+</sup> T<sub>conv</sub> cells. **(h)** IL-17, IL-13 and CCL11 cytokines levels in BAL fluids of respective treated groups ( $n = 4$  for PBS- and 5 for HDM-treated groups). Data represent means ± s.e.m. from two independent experiments. \* $P < 0.05$  and \*\* $P < 0.01$  by one-way ANOVA with Bonferroni posttest analysis. For AHR analyses, \* $P < 0.05$  by repeated measures two-way ANOVA.

**Supplementary Figure 13** Anti-CCL11 partially inhibited HDM-induced airway inflammation in WT and *Il4ra*<sup>R576</sup> mice. **(a)** Methacholine-induced AHR in PBS or HDM-treated WT and *Il4ra*<sup>R576</sup> mice that received anti-CCL11 or isotype antibody prior to antigen-challenge. **(b)** PAS staining of lung sections (20×, scale bar 50 μm). **(c)** Inflammation and PAS scores ( $n = 10$  counts per field-of-view). **(d)** Frequencies of lung tissue eosinophils and neutrophils and total serum IgE concentration. **(e)** Frequencies of Foxp3<sup>+</sup> T<sub>reg</sub> cells. **(f)** IL-17 and IL-13 cytokine levels in BAL fluids in the respective groups. **(g)** CCL11 levels in BAL fluids of respective groups. ( $n = 3$  mice for PBS- and 5 mice for HDM-treated groups). Data represent means ± s.e.m. from one experiment. \* $P < 0.05$ , \*\* $P < 0.01$ , \*\*\* $P < 0.001$  and \*\*\*\* $P < 0.0001$  by one-way ANOVA with Bonferroni posttest analysis. For AHR analyses, \* $P < 0.05$  by repeated measures two-way ANOVA.

**Supplementary Figure 14** Specific deletion of *Il4/Il13* in  $\text{Foxp3}^+$   $\text{T}_{\text{reg}}$  cells was not sufficient to ameliorate aggravated airway inflammation in  $\text{Il4ra}^{\text{R576}}$  mice. (a) Scheme for the generation of  $\text{Foxp3}^{\text{EGFPCre}}\text{Il4/13}^{\Delta/\Delta}$  mice. (b) RT-PCR analysis of *Il4* mRNA transcripts in sorted  $\text{CD4}^+\text{Foxp3}^- \text{T}_{\text{conv}}$  and  $\text{CD4}^+\text{Foxp3}^+ \text{T}_{\text{reg}}$  cells of  $\text{Foxp3}^{\text{EGFPCre}}$  and  $\text{Foxp3}^{\text{EGFPCre}}\text{Il4/13}^{\Delta/\Delta}$  mice ( $n = 3$  mice). (c) PAS staining of lung sections of  $\text{Foxp3}^{\text{EGFPCre}}$ ,  $\text{Il4ra}^{\text{R576}}\text{Il4/113}^{\text{fl/fl}}$ ,  $\text{Foxp3}^{\text{EGFPCre}}\text{Il4/113}^{\Delta/\Delta}$  and  $\text{Il4ra}^{\text{R576}}\text{Foxp3}^{\text{EGFPCre}}\text{Il4/113}^{\Delta/\Delta}$  mice immunized and challenged with OVA (20 $\times$ , scale bar 50  $\mu\text{m}$ ). (d) Inflammation and PAS scores ( $n = 10$  counts per field-of-view). (e) Methacholine-induced AHR. (f) Total and OVA-specific serum IgE concentrations. (g) Frequencies of lung tissue eosinophils, neutrophils and lymphocytes. (h–j) Frequencies and absolute numbers of  $\text{CD4}^+\text{Foxp3}^+ \text{T}_{\text{reg}}$  cells (h), IL-13 (i) and IL-17 (j) producing  $\text{CD4}^+\text{Foxp3}^+ \text{T}_{\text{reg}}$  and  $\text{CD4}^+\text{Foxp3}^- \text{T}_{\text{conv}}$  cells in lung tissues of the respective mouse groups. Data represent means  $\pm$  s.e.m. from two independent experiments ( $n = 7$  mice for PBS- and 10 mice for OVA-treated groups). \* $P < 0.05$ , \*\* $P < 0.01$ , \*\*\* $P < 0.001$  and \*\*\*\* $P < 0.0001$  by one-way ANOVA with Bonferroni posttest analysis. For AHR analyses, \*\* $P < 0.05$  and \*\*\* $P < 0.001$  by repeated measures one-way ANOVA.

**Supplementary Figure 15** Specific deletion of *Il4/Il13* in  $\text{Foxp3}^+$   $\text{T}_{\text{reg}}$  cells rescued aggravated airway inflammation in  $\text{Il4ra}^{\text{F709}}$  mice. (a) PAS staining of lung sections of  $\text{Foxp3}^{\text{EGFPCre}}$ ,  $\text{Il4ra}^{\text{F709}}\text{Il4/113}^{\text{fl/fl}}$ ,  $\text{Foxp3}^{\text{EGFPCre}}\text{Il4/113}^{\Delta/\Delta}$  and  $\text{Il4ra}^{\text{F709}}\text{Foxp3}^{\text{EGFPCre}}\text{Il4/113}^{\Delta/\Delta}$  mice immunized and challenged with OVA (20 $\times$ , scale bar 50  $\mu\text{m}$ ). (b) Inflammation and PAS scores ( $n = 10$  counts per field-of-view). (c) Methacholine-induced AHR. (d) Total and OVA-specific serum IgE concentrations. (e) Frequencies of lung tissue eosinophils, neutrophils and lymphocytes. (f–h) Frequencies



and absolute numbers of CD4<sup>+</sup>Foxp3<sup>+</sup> T<sub>reg</sub> cells (**f**), IL-13 (**g**) and IL-17 (**h**) producing CD4<sup>+</sup>Foxp3<sup>+</sup> T<sub>reg</sub> and CD4<sup>+</sup> Foxp3<sup>-</sup> T<sub>conv</sub> cells in lung tissues of the respective mouse groups. Data represent means ± s.e.m. from two independent experiments ( $n = 7$  mice for PBS- and 10 mice for OVA-treated groups). \* $P < 0.05$ , \*\* $P < 0.01$ , \*\*\* $P < 0.001$  and \*\*\*\* $P < 0.0001$  by one-way ANOVA with Bonferroni posttest analysis. For AHR analysis, \*\*\* $P < 0.001$  by repeated measures two-way ANOVA.

**Supplemental Table 1** Demographic Characteristics and genotype of enrolled non-asthmatic study participants.

| <b>Subject-Genotype</b> | <b>Age (Y)</b> | <b>Sex</b> |
|-------------------------|----------------|------------|
| 1-Q576/Q576             | 22             | M          |
| 2-Q576/Q576             | 28             | M          |
| 3-Q576/Q576             | 31             | M          |
| 4-Q576/Q576             | 32             | M          |
| 5-Q576/Q576             | 36             | F          |
| 6-Q576/Q576             | 24             | F          |
| 7-Q576/Q576             | 26             | F          |
| 8-Q576/Q576             | 27             | F          |
| 9-Q576/Q576             | 29             | M          |
| 10-Q576/Q576            | 21             | M          |
| 11-Q576/Q576            | 25             | M          |
| 12-Q576/Q576            | 34             | M          |
| 13-Q576/Q576            | 46             | M          |
| 14-Q576/R576            | 30             | M          |
| 15-Q576/R576            | 27             | M          |
| 16-Q576/R576            | 26             | F          |
| 17-Q576/R576            | 21             | M          |
| 18-Q576/R576            | 41             | M          |
| 19-R576/R576            | 37             | M          |
| 20-R576/R576            | 36             | M          |
| 21-R576/R576            | 43             | M          |

**Supplemental Table 2** Demographics, genotype and clinical characteristics of enrolled asthmatic study participants.

| <b>Subject-Genotype</b> | <b>Age (Y)</b> | <b>Sex</b> | <b>Asthma Severity</b> |
|-------------------------|----------------|------------|------------------------|
| 1-Q576/Q576             | 13             | M          | Intermittent           |
| 2-Q576/Q576             | 14             | M          | Persistent Mild        |
| 3-Q576/Q576             | 14             | F          | Persistent Mild        |
| 4-Q576/Q576             | 8              | F          | Persistent Mild        |
| 5-Q576/Q576             | 11             | F          | Intermittent           |
| 6-Q576/Q576             | 10             | M          | Persistent Severe      |
| 7-Q576/Q576             | 17             | M          | Persistent Moderate    |
| 8-Q576/Q576             | 16             | M          | Persistent Mild        |
| 9-Q576/Q576             | 11             | M          | Intermittent           |
| 10-Q576/Q576            | 10             | F          | Persistent Moderate    |
| 11-Q576/Q576            | 16             | M          | Intermittent           |
| 12-Q576/Q576            | 12             | F          | Persistent Mild        |
| 13-Q576/Q576            | 11             | M          | Persistent Moderate    |
| 14-Q576/Q576            | 6              | F          | Persistent Moderate    |
| 15-Q576/Q576            | 40             | F          | Persistent Mild        |
| 16-Q576/Q576            | 34             | F          | Persistent Mild        |
| 17-Q576/Q576            | 27             | F          | Persistent Mild        |

|              |    |   |                     |
|--------------|----|---|---------------------|
| 18-Q576/Q576 | 33 | F | Persistent Moderate |
| 19-Q576/Q576 | 3  | F | Persistent Mild     |
| 20-Q576/R576 | 14 | F | Persistent Moderate |
| 21-Q576/R576 | 13 | F | Persistent Mild     |
| 22-Q576/R576 | 15 | F | Persistent Moderate |
| 23-Q576/R576 | 10 | M | Persistent Moderate |
| 24-R576/R576 | 9  | F | Persistent Moderate |
| 25-R576/R576 | 26 | F | Persistent Moderate |
| 26-R576/R576 | 11 | F | Persistent Moderate |
| 27-R576/R576 | 12 | M | Persistent Severe   |
| 28-R576/R576 | 12 | M | Persistent Severe   |
| 29-R576/R576 | 14 | M | Persistent Severe   |
| 30-R576/R576 | 11 | M | Persistent Severe   |

Asthma severity was classified as follows: Intermittent (symptoms < 2 days/week), Mild (symptoms > 2 days/week but not daily), Moderate (daily symptoms), and Severe (symptoms throughout the day). An average asthma severity score was calculated for each group by assigning intermittent asthma a score of 1, mild persistent asthma a score of 2, moderate persistent asthma a score of 3 and severe asthma a score of 4. The average severity score for asthmatics homozygous for the Q576 residue ( $n = 19$ ) was  $2.16 \pm 0.19$  and those heterozygous or homozygous for the R576 residue ( $n=11$ ) was  $3.27 \pm 0.19$  ( $p=0.0007$  by Student's unpaired two tailed t test). The two groups were otherwise not significantly different by age ( $p = 0.40$  by Student's unpaired two tailed t test) or sex ( $0.69$  by Fisher's exact test).
